# Supplementary material for: Accelerating discovery of glass materials in electronic devices through topology-guided machine learning
Source: Royal Society of Chemistry journal article supplement (doi:10.1039/d4ta08686d), 2025-01-01
Supplement: d4ta08686d2.xlsx [file d4ta08686d2.xlsx]

## Sheet: Sheet1
SiO2	Al2O3	B2O3	K2O	Na2O	Li2O	NC	TEC	Tg	Tm	Distance
52	38	0	0	10	0	2.96277	66.3843	832.463	1248.69	15.3008
50	40	0	0	10	0	2.94737	65.581	830.083	1245.12	17.2655
48	42	0	0	10	0	2.93229	66.7169	830.083	1245.12	18.7112
54	36	0	0	10	0	2.97849	62.5721	829.554	1244.33	12.5728
52	38	0	2	8	0	2.96277	89.3216	828.051	1242.08	15.941
52	38	0	0	8	2	2.96277	67.6869	827.769	1241.65	15.941
56	34	0	0	10	0	2.99457	62.2356	826.042	1239.06	9.90174
50	40	0	2	8	0	2.94737	88.5183	825.67	1238.51	18.6037
48	42	0	2	8	0	2.93229	89.6541	825.67	1238.51	19.9527
50	40	0	0	8	2	2.94737	66.8836	825.388	1238.08	18.6037
48	42	0	0	8	2	2.93229	68.0194	825.388	1238.08	19.9527
56	34	0	2	8	0	2.99457	85.1729	825.344	1238.02	10.8648
54	36	0	2	8	0	2.97849	85.5093	825.142	1237.71	13.3445
56	34	0	0	8	2	2.99457	63.5382	825.063	1237.59	10.8648
54	36	0	0	8	2	2.97849	63.8746	824.86	1237.29	13.3445
58	32	0	0	10	0	3.01099	59.0194	821.155	1231.73	7.34999
58	32	0	0	8	2	3.01099	60.322	820.892	1231.34	8.60362
58	32	0	2	8	0	3.01099	81.9567	820.458	1230.69	8.60362
52	38	0	10	0	0	2.96277	90.7391	820.114	1230.17	22.2287
52	38	0	6	2	2	2.96277	87.7115	819.437	1229.16	19.6498
52	38	0	4	0	6	2.96277	89.9844	818.769	1228.15	21.1214
52	38	0	0	0	10	2.96277	56.5703	818.086	1227.13	22.2287
52	38	0	2	0	8	2.96277	77.4688	817.797	1226.7	21.4969
56	34	0	10	0	0	2.99457	86.8964	817.408	1226.11	18.9221
54	36	0	10	0	0	2.97849	86.9269	817.205	1225.81	20.4469
50	40	0	6	2	2	2.94737	86.9082	817.057	1225.59	21.8669
48	42	0	6	2	2	2.93229	88.82	817.057	1225.59	24.2119
50	40	0	10	0	0	2.94737	89.9359	816.754	1225.13	24.2108
48	42	0	10	0	0	2.93229	90.8796	816.754	1225.13	26.348
56	34	0	6	2	2	2.99457	83.8688	816.731	1225.1	15.8128
54	36	0	6	2	2	2.97849	83.8993	816.528	1224.79	17.609
52	38	0	6	0	4	2.96277	90.3875	816.473	1224.71	21.1214
50	40	0	4	0	6	2.94737	89.1811	816.388	1224.58	23.1983
48	42	0	4	0	6	2.93229	90.8179	816.388	1224.58	25.4208
56	34	0	4	0	6	2.99457	85.8774	816.063	1224.09	17.6081
54	36	0	4	0	6	2.97849	85.9079	815.86	1223.79	19.2373
50	40	0	0	0	10	2.94737	55.767	815.705	1223.56	24.2108
48	42	0	0	0	10	2.93229	57.4038	815.705	1223.56	26.348
50	40	0	2	0	8	2.94737	76.6655	815.417	1223.13	23.5406
48	42	0	2	0	8	2.93229	78.3023	815.417	1223.13	25.7336
56	34	0	0	0	10	2.99457	53.7348	815.379	1223.07	17.3824
52	38	0	8	0	2	2.96277	90.506	815.342	1223.01	21.4969
54	36	0	0	0	10	2.97849	53.7653	815.177	1222.76	20.055
56	34	0	2	0	8	2.99457	74.6333	815.091	1222.64	18.0567
54	36	0	2	0	8	2.97849	74.6638	814.888	1222.33	19.6488
52	34	4	0	10	0	2.9734	65.5588	814.497	1221.75	12.8873
52	36	2	0	10	0	2.96809	66.3347	814.497	1221.75	13.9318
50	40	0	6	0	4	2.94737	89.5842	814.092	1221.14	23.1983
48	42	0	6	0	4	2.93229	91.221	814.092	1221.14	25.4208
56	34	0	6	0	4	2.99457	86.2806	813.767	1220.65	17.6081
54	36	0	6	0	4	2.97849	86.3111	813.564	1220.35	19.2373
52	38	0	2	6	2	2.96277	88.7198	813.404	1220.11	16.7963
68	22	0	0	10	0	3.09884	58.6042	813.319	1219.98	4.24459
58	32	0	10	0	0	3.01099	83.7289	813.237	1219.86	17.7207
50	36	4	0	10	0	2.95789	63.4765	813.096	1219.64	13.641
50	38	2	0	10	0	2.95263	65.8907	813.096	1219.64	15.2998
50	40	0	8	0	2	2.94737	89.7027	812.962	1219.44	23.5406
48	42	0	8	0	2	2.93229	90.6465	812.962	1219.44	25.7336
56	34	0	8	0	2	2.99457	86.6632	812.636	1218.95	18.0567
58	32	0	6	2	2	3.01099	80.7013	812.56	1218.84	14.3535
54	36	0	8	0	2	2.97849	86.6937	812.434	1218.65	19.6488
48	38	4	0	10	0	2.94271	65.8073	812.116	1218.17	14.9023
48	40	2	0	10	0	2.9375	67.0265	812.116	1218.17	16.6761
68	22	0	2	8	0	3.09884	69.5248	811.993	1217.99	6.16575
58	32	0	4	0	6	3.01099	82.71	811.891	1217.84	16.3102
54	32	4	0	10	0	2.98925	63.4354	811.791	1217.69	10.4905
54	34	2	0	10	0	2.98387	62.8817	811.588	1217.38	11.2277
58	32	0	0	0	10	3.01099	50.5673	811.208	1216.81	14.7684
50	40	0	2	6	2	2.94737	87.9165	811.023	1216.53	19.3433
48	42	0	2	6	2	2.93229	89.0523	811.023	1216.53	21.3098
58	32	0	2	0	8	3.01099	71.4658	810.92	1216.38	15.6877
52	38	0	8	2	0	2.96277	91.1619	810.889	1216.33	20.2513
56	34	0	2	6	2	2.99457	84.5711	810.698	1216.05	12.0849
54	36	0	2	6	2	2.97849	84.9075	810.495	1215.74	14.3553
52	34	4	2	8	0	2.9734	83.7671	810.084	1215.13	13.787
52	36	2	2	8	0	2.96809	84.9404	810.084	1215.13	14.632
68	22	0	4	0	6	3.09884	66.422	810.054	1215.08	10.4894
52	34	4	0	8	2	2.9734	65.9233	809.802	1214.7	13.787
52	36	2	0	8	2	2.96809	67.0966	809.802	1214.7	14.632
58	32	0	6	0	4	3.01099	83.1131	809.596	1214.39	16.3102
68	22	0	0	8	2	3.09884	54.9333	809.471	1214.21	6.16575
68	22	0	0	0	10	3.09884	51.6095	809.371	1214.06	6.16664
52	38	0	4	6	0	2.96277	90.3251	809.202	1213.8	17.0328
68	22	0	2	0	8	3.09884	60.4914	809.082	1213.62	8.12573
50	36	4	2	8	0	2.95789	81.6847	808.683	1213.03	15.2995
50	38	2	2	8	0	2.95263	84.4964	808.683	1213.03	16.7954
50	40	0	8	2	0	2.94737	90.3586	808.509	1212.76	22.409
48	42	0	8	2	0	2.93229	91.3024	808.509	1212.76	24.7026
58	32	0	8	0	2	3.01099	83.4958	808.465	1212.7	16.7935
50	36	4	0	8	2	2.95789	63.8409	808.402	1212.6	15.2995
50	38	2	0	8	2	2.95263	66.6526	808.402	1212.6	16.7954
68	22	0	10	0	0	3.09884	76.4641	808.227	1212.34	16.6738
56	34	0	8	2	0	2.99457	87.3191	808.183	1212.27	16.5543
56	32	2	0	10	0	3	61.2956	808.075	1212.11	8.60427
54	36	0	8	2	0	2.97849	87.3496	807.98	1211.97	18.2777
68	22	0	6	0	4	3.09884	69.548	807.758	1211.64	13.0395
48	38	4	2	8	0	2.94271	84.0156	807.704	1211.56	16.4341
48	40	2	2	8	0	2.9375	85.6323	807.704	1211.56	18.058
68	22	0	6	2	2	3.09884	67.1362	807.55	1211.33	13.039
48	38	4	0	8	2	2.94271	66.1718	807.422	1211.13	16.4341
48	40	2	0	8	2	2.9375	67.7884	807.422	1211.13	18.058
56	32	2	2	8	0	3	79.9013	807.378	1211.07	9.69709
54	32	4	2	8	0	2.98925	81.6437	807.378	1211.07	11.404
54	34	2	2	8	0	2.98387	81.4875	807.175	1210.76	12.0855
56	32	2	0	8	2	3	62.0575	807.096	1210.64	9.69709
54	32	4	0	8	2	2.98925	63.7998	807.096	1210.64	11.404
54	34	2	0	8	2	2.98387	63.6436	806.893	1210.34	12.0855
50	40	0	4	6	0	2.94737	89.5218	806.821	1210.23	19.549
48	42	0	4	6	0	2.93229	90.6576	806.821	1210.23	21.4967
58	32	0	2	6	2	3.01099	81.3548	806.526	1209.79	10.1006
62	28	0	0	10	0	3.04494	58.9834	806.526	1209.79	3.74263
56	34	0	4	6	0	2.99457	86.1764	806.495	1209.74	12.4115
54	36	0	4	6	0	2.97849	86.5128	806.293	1209.44	14.6313
62	28	0	0	8	2	3.04494	55.3125	805.633	1208.45	5.83158
62	28	0	2	8	0	3.04494	69.647	805.199	1207.8	5.83158
64	26	0	0	10	0	3.0625	57.7079	804.895	1207.34	4.2445
58	32	0	8	2	0	3.01099	84.1516	804.012	1206.02	15.1665
64	26	0	0	8	2	3.0625	54.037	804.002	1206	6.16569
66	24	0	0	10	0	3.08046	57.6804	803.988	1205.98	3.74267
62	28	0	4	0	6	3.04494	65.7179	803.815	1205.72	13.04
52	38	0	6	4	0	2.96277	88.8429	803.594	1205.39	18.4963
52	38	0	4	4	2	2.96277	89.6236	803.572	1205.36	18.0586
64	26	0	2	8	0	3.0625	68.6285	803.569	1205.35	6.16569
68	22	0	8	0	2	3.09884	71.4157	803.456	1205.18	15.6849
62	28	0	0	0	10	3.04494	53.479	803.132	1204.7	9.90161
66	24	0	0	8	2	3.08046	54.0095	803.094	1204.64	5.8316
62	28	0	2	0	8	3.04494	62.1038	802.843	1204.27	11.2268
66	24	0	2	8	0	3.08046	68.601	802.661	1203.99	5.8316
58	32	0	4	6	0	3.01099	82.9601	802.324	1203.49	10.4892
64	26	0	4	0	6	3.0625	64.6994	802.185	1203.28	11.5769
52	34	4	10	0	0	2.9734	84.1899	802.148	1203.22	20.7384
52	36	2	10	0	0	2.96809	84.2624	802.148	1203.22	21.3095
62	28	0	10	0	0	3.04494	75.829	801.988	1202.98	16.5532
52	34	4	4	0	6	2.9734	84.1657	801.847	1202.77	19.5469
52	36	2	4	0	6	2.96809	85.6032	801.847	1202.77	20.1518
62	28	0	6	0	4	3.04494	69.412	801.519	1202.28	15.0335
64	26	0	0	0	10	3.0625	52.2034	801.501	1202.25	7.87564
52	34	4	6	2	2	2.9734	82.8576	801.471	1202.21	17.9466
52	36	2	6	2	2	2.96809	83.3304	801.471	1202.21	18.6036
62	28	0	6	2	2	3.04494	67.0002	801.311	1201.97	12.8844
66	24	0	4	0	6	3.08046	64.6719	801.277	1201.92	10.678
50	40	0	6	4	0	2.94737	88.0396	801.213	1201.82	20.8365
48	42	0	6	4	0	2.93229	89.1754	801.213	1201.82	23.2832
64	26	0	2	0	8	3.0625	61.0853	801.213	1201.82	9.48819
50	40	0	4	4	2	2.94737	88.8203	801.192	1201.79	20.449
48	42	0	4	4	2	2.93229	89.9561	801.192	1201.79	22.9371
52	34	4	0	0	10	2.9734	56.9343	801.164	1201.75	20.1546
52	36	2	0	0	10	2.96809	57.1004	801.164	1201.75	21.3095
56	34	0	6	4	0	2.99457	84.6942	800.888	1201.33	14.3542
52	34	4	2	0	8	2.9734	74.0419	800.875	1201.31	19.952
52	36	2	2	0	8	2.96809	74.208	800.875	1201.31	20.545
56	34	0	4	4	2	2.99457	85.4749	800.866	1201.3	13.7857
50	36	4	10	0	0	2.95789	82.1075	800.747	1201.12	22.4971
50	38	2	10	0	0	2.95263	83.8184	800.747	1201.12	23.1978
54	36	0	6	4	0	2.97849	85.0306	800.685	1201.03	16.3118
54	36	0	4	4	2	2.97849	85.8113	800.663	1201	15.8138
66	24	0	0	0	10	3.08046	49.2727	800.594	1200.89	6.48233
52	38	0	0	2	8	2.96277	56.6244	800.514	1200.77	20.2513
50	36	4	4	0	6	2.95789	82.3476	800.446	1200.67	21.4038
50	38	2	4	0	6	2.95263	85.1593	800.446	1200.67	22.1391
64	26	0	10	0	0	3.0625	76.32	800.358	1200.54	16.6738
66	24	0	2	0	8	3.08046	58.1546	800.305	1200.46	8.36783
52	38	0	2	2	6	2.96277	89.035	800.226	1200.34	19.6498
50	36	4	6	2	2	2.95789	80.7752	800.07	1200.1	19.953
50	38	2	6	2	2	2.95263	82.8864	800.07	1200.1	20.7398
64	26	0	6	0	4	3.0625	68.3935	799.889	1199.83	13.9293
52	38	0	4	2	4	2.96277	91.8769	799.774	1199.66	19.4452
50	36	4	0	0	10	2.95789	53.8447	799.763	1199.64	22.4971
50	38	2	0	0	10	2.95263	56.6564	799.763	1199.64	23.1978
64	26	0	6	2	2	3.0625	65.9817	799.681	1199.52	13.039
52	34	4	6	0	4	2.9734	85.2694	799.551	1199.33	19.5469
52	36	2	6	0	4	2.96809	86.0064	799.551	1199.33	20.1518
50	36	4	2	0	8	2.95789	70.9523	799.475	1199.21	21.7743
50	38	2	2	0	8	2.95263	73.764	799.475	1199.21	22.4975
48	38	4	4	0	6	2.94271	85.4543	799.466	1199.2	23.4557
48	40	2	4	0	6	2.9375	86.796	799.466	1199.2	24.2938
66	24	0	10	0	0	3.08046	74.9744	799.45	1199.18	16.5532
56	32	2	10	0	0	3	79.5292	799.442	1199.16	18.2766
54	32	4	10	0	0	2.98925	81.2097	799.442	1199.16	19.2367
54	34	2	10	0	0	2.98387	80.8094	799.239	1198.86	19.6484
56	32	2	4	0	6	3	80.6059	799.141	1198.71	16.9125
54	32	4	4	0	6	2.98925	82.0423	799.141	1198.71	17.9458
48	38	4	6	2	2	2.94271	83.882	799.09	1198.64	22.0472
48	40	2	6	2	2	2.9375	84.7981	799.09	1198.64	23.0258
68	22	0	8	2	0	3.09884	77.0451	799.002	1198.5	13.929
66	24	0	6	0	4	3.08046	68.3661	798.981	1198.47	13.1917
54	34	2	4	0	6	2.98387	81.8861	798.938	1198.41	18.3864
48	38	4	10	0	0	2.94271	85.2143	798.787	1198.18	24.4575
48	40	2	10	0	0	2.9375	85.7302	798.787	1198.18	25.2624
48	38	4	0	0	10	2.94271	56.9514	798.783	1198.18	24.4575
48	40	2	0	0	10	2.9375	58.2932	798.783	1198.18	25.2624
66	24	0	6	2	2	3.08046	65.9543	798.773	1198.16	12.8844
56	32	2	6	2	2	3	78.5972	798.765	1198.15	15.0344
54	32	4	6	2	2	2.98925	79.8774	798.765	1198.15	16.188
54	34	2	6	2	2	2.98387	79.8774	798.562	1197.84	16.6751
48	38	4	2	0	8	2.94271	74.059	798.495	1197.74	23.7943
48	40	2	2	0	8	2.9375	75.4008	798.495	1197.74	24.6209
56	32	2	0	0	10	3	53.3744	798.458	1197.69	15.9414
54	32	4	0	0	10	2.98925	54.8108	798.458	1197.69	17.4973
54	34	2	0	0	10	2.98387	54.6546	798.255	1197.38	18.6058
56	32	2	2	0	8	3	70.4821	798.169	1197.25	16.7966
54	32	4	2	0	8	2.98925	71.9185	798.169	1197.25	18.2799
50	36	4	6	0	4	2.95789	83.4512	798.15	1197.23	21.4038
50	38	2	6	0	4	2.95263	85.5624	798.15	1197.23	22.1391
50	40	0	0	2	8	2.94737	55.8211	798.134	1197.2	22.409
48	42	0	0	2	8	2.93229	57.4579	798.134	1197.2	24.7026
54	34	2	2	0	8	2.98387	71.7622	797.966	1196.95	18.8165
50	40	0	2	2	6	2.94737	88.2317	797.846	1196.77	21.8669
48	42	0	2	2	6	2.93229	89.8685	797.846	1196.77	24.2119
56	34	0	0	2	8	2.99457	53.7888	797.808	1196.71	16.5543
54	36	0	0	2	8	2.97849	53.8193	797.606	1196.41	18.2777
56	34	0	2	2	6	2.99457	84.928	797.52	1196.28	15.8128
68	22	0	2	6	2	3.09884	63.9496	797.506	1196.26	8.12505
50	40	0	4	2	4	2.94737	91.0736	797.393	1196.09	21.6832
48	42	0	4	2	4	2.93229	92.7104	797.393	1196.09	24.0461
52	34	4	8	0	2	2.9734	84.566	797.376	1196.06	19.952
52	36	2	8	0	2	2.96809	84.0293	797.376	1196.06	20.545
54	36	0	2	2	6	2.97849	84.9585	797.317	1195.98	17.609
62	28	0	8	0	2	3.04494	72.5979	797.217	1195.83	15.5566
48	38	4	6	0	4	2.94271	86.558	797.171	1195.76	23.4557
48	40	2	6	0	4	2.9375	87.1992	797.171	1195.76	24.2938
56	34	0	4	2	4	2.99457	87.77	797.067	1195.6	15.5578
54	36	0	4	2	4	2.97849	87.8005	796.865	1195.3	17.3803
56	32	2	6	0	4	3	81.009	796.845	1195.27	16.9125
54	32	4	6	0	4	2.98925	82.2892	796.845	1195.27	17.9458
58	32	0	6	4	0	3.01099	81.4779	796.716	1195.07	12.7288
58	32	0	4	4	2	3.01099	82.2587	796.695	1195.04	12.084
54	34	2	6	0	4	2.98387	82.2892	796.642	1194.96	18.3864
50	36	4	8	0	2	2.95789	82.4836	795.975	1193.96	21.7743
50	38	2	8	0	2	2.95263	83.5853	795.975	1193.96	22.4975
64	26	0	8	0	2	3.0625	71.5794	795.586	1193.38	15.6849
60	30	0	0	10	0	3.02778	54.5718	795.477	1193.22	5.09997
52	34	4	2	6	2	2.9734	83.1653	795.437	1193.16	14.7676
52	36	2	2	6	2	2.96809	84.3386	795.437	1193.16	15.5594
48	38	4	8	0	2	2.94271	85.5904	794.996	1192.49	23.7943
48	40	2	8	0	2	2.9375	85.497	794.996	1192.49	24.6209
66	24	0	8	0	2	3.08046	70.2338	794.679	1192.02	15.5566
56	32	2	8	0	2	3	79.2961	794.67	1192.01	17.3791
54	32	4	8	0	2	2.98925	81.5858	794.67	1192.01	18.3862
60	30	0	0	8	2	3.02778	50.9009	794.583	1191.88	6.78305
54	34	2	8	0	2	2.98387	80.5763	794.467	1191.7	18.8165
60	30	0	2	8	0	3.02778	65.2354	794.15	1191.23	6.78305
50	36	4	2	6	2	2.95789	81.0829	794.037	1191.05	17.0316
50	38	2	2	6	2	2.95263	83.8946	794.037	1191.05	18.0593
58	32	0	0	2	8	3.01099	50.6214	793.637	1190.46	15.1665
58	32	0	2	2	6	3.01099	81.7605	793.349	1190.02	14.3535
68	22	0	4	6	0	3.09884	70.5283	793.304	1189.96	8.60328
52	38	0	0	6	4	2.96277	69.5624	793.267	1189.9	17.0328
48	38	4	2	6	2	2.94271	83.4138	793.057	1189.59	18.0576
48	40	2	2	6	2	2.9375	85.0305	793.057	1189.59	19.5471
52	34	4	8	2	0	2.9734	85.2219	792.923	1189.38	18.6033
52	36	2	8	2	0	2.96809	84.6851	792.923	1189.38	19.2379
58	32	0	4	2	4	3.01099	84.6025	792.896	1189.34	14.072
62	28	0	8	2	0	3.04494	78.2272	792.763	1189.14	13.7843
56	32	2	2	6	2	3	79.2995	792.731	1189.1	11.0469
54	32	4	2	6	2	2.98925	81.0419	792.731	1189.1	12.5718
54	34	2	2	6	2	2.98387	80.8856	792.528	1188.79	13.1932
68	22	0	0	2	8	3.09884	51.6636	791.8	1187.7	8.12573
50	36	4	8	2	0	2.95789	83.1395	791.522	1187.28	20.5456
50	38	2	8	2	0	2.95263	84.2412	791.522	1187.28	21.3105
68	22	0	2	2	6	3.09884	65.4726	791.511	1187.27	10.1009
52	38	0	0	4	6	2.96277	67.6243	791.402	1187.1	18.4963
62	28	0	2	6	2	3.04494	64.3628	791.268	1186.9	7.87447
52	34	4	4	6	0	2.9734	84.7706	791.235	1186.85	15.036
52	36	2	4	6	0	2.96809	85.9439	791.235	1186.85	15.8144
64	26	0	8	2	0	3.0625	77.2087	791.133	1186.7	13.929
68	22	0	4	2	4	3.09884	68.3146	791.059	1186.59	12.4108
50	40	0	0	6	4	2.94737	68.7591	790.887	1186.33	19.549
48	42	0	0	6	4	2.93229	69.62	790.887	1186.33	21.4967
72	18	0	10	0	0	3.1369	72.059	790.632	1185.95	15.685
56	34	0	0	6	4	2.99457	65.1495	790.561	1185.84	12.4115
48	38	4	8	2	0	2.94271	86.2463	790.542	1185.81	22.5849
48	40	2	8	2	0	2.9375	86.1529	790.542	1185.81	23.5412
54	36	0	0	6	4	2.97849	65.486	790.358	1185.54	14.6313
66	24	0	8	2	0	3.08046	75.8631	790.225	1185.34	13.7843
56	32	2	8	2	0	3	79.952	790.216	1185.32	15.8124
54	32	4	8	2	0	2.98925	82.2417	790.216	1185.32	16.913
54	34	2	8	2	0	2.98387	81.2322	790.014	1185.02	17.3799
50	36	4	4	6	0	2.95789	82.6882	789.834	1184.75	17.2649
50	38	2	4	6	0	2.95263	85.4999	789.834	1184.75	18.2795
64	26	0	2	6	2	3.0625	63.3443	789.637	1184.46	8.12501
50	40	0	0	4	6	2.94737	66.821	789.021	1183.53	20.8365
48	42	0	0	4	6	2.93229	67.6819	789.021	1183.53	23.2832
48	38	4	4	6	0	2.94271	85.0191	788.855	1183.28	18.2778
48	40	2	4	6	0	2.9375	86.6358	788.855	1183.28	19.7507
60	30	0	4	0	6	3.02778	61.0152	788.755	1183.13	14.902
66	24	0	2	6	2	3.08046	63.3168	788.729	1183.09	7.87449
56	34	0	0	4	6	2.99457	63.2114	788.696	1183.04	14.3542
60	28	2	0	10	0	3.03333	60.3704	788.559	1182.84	4.24356
56	32	2	4	6	0	3	80.9048	788.529	1182.79	11.4032
54	32	4	4	6	0	2.98925	82.6472	788.529	1182.79	12.8861
54	36	0	0	4	6	2.97849	63.5478	788.493	1182.74	16.3118
54	34	2	4	6	0	2.98387	82.4909	788.326	1182.49	13.493
52	38	0	2	4	4	2.96277	91.3501	788.242	1182.36	18.0586
60	30	0	0	0	10	3.02778	48.7763	788.072	1182.11	12.2502
60	30	0	2	0	8	3.02778	57.4011	787.784	1181.68	13.3442
68	22	0	6	4	0	3.09884	71.7689	787.697	1181.54	11.2257
68	22	0	4	4	2	3.09884	64.8534	787.675	1181.51	10.4889
60	28	2	0	8	2	3.03333	56.1588	787.666	1181.5	6.16504
46	44	0	0	10	0	2.91753	61.9003	787.569	1181.35	20.4481
60	28	2	2	8	0	3.03333	71.4557	787.233	1180.85	6.16504
62	28	0	4	6	0	3.04494	70.9415	787.065	1180.6	8.36704
60	30	0	10	0	0	3.02778	71.0242	786.929	1180.39	16.9118
60	30	0	6	0	4	3.02778	64.1412	786.46	1179.69	15.4276
58	32	0	0	6	4	3.01099	61.9333	786.39	1179.58	10.4892
60	30	0	6	2	2	3.02778	61.7294	786.252	1179.38	13.342
66	22	2	0	10	0	3.08621	57.2044	786.021	1179.03	3.74305
64	24	2	0	10	0	3.06818	58.0175	786.021	1179.03	4.24362
50	40	0	2	4	4	2.94737	90.5469	785.862	1178.79	20.449
48	42	0	2	4	4	2.93229	91.4077	785.862	1178.79	22.9371
62	26	2	0	10	0	3.05056	57.8106	785.846	1178.77	3.74301
52	34	4	6	4	0	2.9734	83.9889	785.627	1178.44	16.6758
52	36	2	6	4	0	2.96809	84.4617	785.627	1178.44	17.3809
52	34	4	4	4	2	2.9734	84.0691	785.606	1178.41	16.1889
52	36	2	4	4	2	2.96809	85.2424	785.606	1178.41	16.9144
62	28	0	0	2	8	3.04494	53.533	785.561	1178.34	11.2268
56	34	0	2	4	4	2.99457	86.9373	785.536	1178.3	13.7857
64	26	0	4	6	0	3.0625	69.923	785.435	1178.15	8.60324
58	28	4	0	10	0	3.02198	61.8311	785.353	1178.03	6.16564
54	36	0	2	4	4	2.97849	87.2737	785.333	1178	15.8138
62	28	0	2	2	6	3.04494	64.7685	785.273	1177.91	12.7296
66	22	2	0	8	2	3.08621	52.9929	785.128	1177.69	5.83185
64	24	2	0	8	2	3.06818	53.806	785.128	1177.69	6.16509
40	50	0	0	10	0	2.875	73.822	785.122	1177.68	26.7996
72	18	0	8	0	2	3.1369	66.4938	785.088	1177.63	13.0391
62	26	2	0	8	2	3.05056	53.5991	784.953	1177.43	5.83182
62	28	0	4	2	4	3.04494	67.6104	784.82	1177.23	12.5701
66	22	2	2	8	0	3.08621	70.297	784.695	1177.04	5.83185
64	24	2	2	8	0	3.06818	71.1101	784.695	1177.04	6.16509
32	58	0	0	10	0	2.82212	85.7975	784.581	1176.87	36.6392
30	60	0	0	10	0	2.80952	86.4003	784.581	1176.87	39.2236
28	62	0	0	10	0	2.79717	85.5644	784.581	1176.87	41.8397
26	64	0	0	10	0	2.78505	86.6972	784.581	1176.87	44.4819
24	66	0	0	10	0	2.77315	86.6972	784.581	1176.87	47.1456
22	68	0	0	10	0	2.76147	86.1227	784.581	1176.87	49.8276
20	70	0	0	10	0	2.75	86.1541	784.581	1176.87	52.525
18	72	0	0	10	0	2.73874	86.1541	784.581	1176.87	55.2355
16	74	0	0	10	0	2.72768	87.7872	784.581	1176.87	57.9573
14	76	0	0	10	0	2.71681	88.9796	784.581	1176.87	60.6889
12	78	0	0	10	0	2.70614	88.9796	784.581	1176.87	63.429
10	80	0	0	10	0	2.69565	83.0212	784.581	1176.87	66.1765
8	82	0	0	10	0	2.68534	86.22	784.581	1176.87	68.9306
6	84	0	0	10	0	2.67521	86.22	784.581	1176.87	71.6905
4	86	0	0	10	0	2.66525	85.5067	784.581	1176.87	74.4556
2	88	0	0	10	0	2.65546	85.2433	784.581	1176.87	77.2253
0	90	0	0	10	0	2.64583	89.586	784.581	1176.87	79.999
66	24	0	4	6	0	3.08046	69.8956	784.527	1176.79	8.36705
58	32	0	0	4	6	3.01099	59.9952	784.524	1176.79	12.7288
62	26	2	2	8	0	3.05056	70.9032	784.52	1176.78	5.83182
58	28	4	0	8	2	3.02198	62.1955	784.459	1176.69	7.61677
66	22	2	4	0	6	3.08621	67.4853	784.355	1176.53	10.2967
64	24	2	4	0	6	3.06818	67.1811	784.355	1176.53	10.8638
50	36	4	6	4	0	2.95789	81.9065	784.226	1176.34	18.8181
50	38	2	6	4	0	2.95263	84.0177	784.226	1176.34	19.6504
50	36	4	4	4	2	2.95789	81.9868	784.205	1176.31	18.3881
50	38	2	4	4	2	2.95263	84.7985	784.205	1176.31	19.239
62	26	2	4	0	6	3.05056	66.9741	784.18	1176.27	12.0844
58	28	4	2	8	0	3.02198	72.5189	784.026	1176.04	7.61677
64	26	0	0	2	8	3.0625	52.2575	783.931	1175.9	9.48819
66	22	2	0	0	10	3.08621	51.0805	783.672	1175.51	5.83279
64	24	2	0	0	10	3.06818	53.0928	783.672	1175.51	6.78391
64	26	0	2	2	6	3.0625	63.75	783.642	1175.46	11.2261
52	34	4	0	2	8	2.9734	56.9883	783.593	1175.39	18.6033
52	36	2	0	2	8	2.96809	57.1544	783.593	1175.39	19.2379
44	46	0	0	10	0	2.90306	61.1374	783.513	1175.27	22.4087
42	48	0	0	10	0	2.88889	74.1068	783.513	1175.27	24.5394
62	26	2	0	0	10	3.05056	52.8858	783.497	1175.25	8.60422
66	22	2	2	0	8	3.08621	62.675	783.384	1175.08	7.87537
64	24	2	2	0	8	3.06818	64.6872	783.384	1175.08	8.60357
52	34	4	2	2	6	2.9734	83.2163	783.304	1174.96	17.9466
52	36	2	2	2	6	2.96809	84.6538	783.304	1174.96	18.6036
48	38	4	6	4	0	2.94271	84.2374	783.247	1174.87	20.3489
48	40	2	6	4	0	2.9375	85.1536	783.247	1174.87	21.6816
48	38	4	4	4	2	2.94271	84.3176	783.226	1174.84	19.9519
48	40	2	4	4	2	2.9375	85.9343	783.226	1174.84	21.3094
62	26	2	2	0	8	3.05056	64.4803	783.208	1174.81	10.1011
64	26	0	4	2	4	3.0625	66.5919	783.189	1174.78	12.7285
46	44	0	2	8	0	2.91753	89.6107	783.157	1174.73	21.59
66	24	0	0	2	8	3.08046	49.3268	783.023	1174.53	8.36783
56	32	2	6	4	0	3	79.4226	782.921	1174.38	13.492
54	32	4	6	4	0	2.98925	81.0087	782.921	1174.38	14.7665
56	32	2	4	4	2	3	80.2033	782.9	1174.35	12.8854
54	32	4	4	4	2	2.98925	81.9457	782.9	1174.35	14.2145
60	28	2	4	0	6	3.03333	67.2356	782.883	1174.32	13.786
46	44	0	0	8	2	2.91753	63.2029	782.875	1174.31	21.59
52	34	4	4	2	4	2.9734	86.0583	782.852	1174.28	17.7224
52	36	2	4	2	4	2.96809	87.4958	782.852	1174.28	18.3874
64	22	4	0	10	0	3.07386	58.2657	782.814	1174.22	5.10023
38	52	0	0	10	0	2.86139	85.2805	782.753	1174.13	29.1593
66	24	0	2	2	6	3.08046	63.7225	782.734	1174.1	10.2966
54	34	2	6	4	0	2.98387	81.0087	782.718	1174.08	15.299
54	34	2	4	4	2	2.98387	81.7895	782.697	1174.05	14.7669
62	24	4	0	10	0	3.05618	57.8929	782.639	1173.96	5.47897
60	26	4	0	10	0	3.03889	59.4415	782.639	1173.96	5.10018
56	30	4	0	10	0	3.00543	61.8492	782.395	1173.59	8.12578
72	18	0	4	0	6	3.1369	62.1334	782.37	1173.55	8.12522
66	24	0	4	2	4	3.08046	66.5645	782.282	1173.42	12.5701
60	28	2	0	0	10	3.03333	55.1545	782.2	1173.3	10.8653
50	36	4	0	2	8	2.95789	53.8987	782.192	1173.29	20.5456
50	38	2	0	2	8	2.95263	56.7104	782.192	1173.29	21.3105
60	30	0	8	0	2	3.02778	67.3271	782.157	1173.24	15.9377
32	58	0	2	8	0	2.82212	113.508	782.134	1173.2	37.2885
30	60	0	2	8	0	2.80952	114.111	782.134	1173.2	39.8308
28	62	0	2	8	0	2.79717	113.275	782.134	1173.2	42.4095
26	64	0	2	8	0	2.78505	114.408	782.134	1173.2	45.0182
24	66	0	2	8	0	2.77315	114.408	782.134	1173.2	47.652
22	68	0	2	8	0	2.76147	113.833	782.134	1173.2	50.307
20	70	0	2	8	0	2.75	113.864	782.134	1173.2	52.9799
18	72	0	2	8	0	2.73874	113.864	782.134	1173.2	55.6683
16	74	0	2	8	0	2.72768	115.498	782.134	1173.2	58.3699
14	76	0	2	8	0	2.71681	116.69	782.134	1173.2	61.0831
12	78	0	2	8	0	2.70614	116.69	782.134	1173.2	63.8062
10	80	0	2	8	0	2.69565	115.61	782.134	1173.2	66.5382
8	82	0	2	8	0	2.68534	113.384	782.134	1173.2	69.2779
6	84	0	2	8	0	2.67521	113.384	782.134	1173.2	72.0245
4	86	0	2	8	0	2.66525	112.67	782.134	1173.2	74.7772
2	88	0	2	8	0	2.65546	112.407	782.134	1173.2	77.5354
0	90	0	2	8	0	2.64583	116.75	782.134	1173.2	80.2985
66	22	2	6	0	4	3.08621	68.4565	782.059	1173.09	12.8849
64	24	2	6	0	4	3.06818	68.1523	782.059	1173.09	13.3425
74	16	0	10	0	0	3.15663	72.8606	781.991	1172.99	15.0334
64	22	4	0	8	2	3.07386	53.6568	781.921	1172.88	6.78324
60	28	2	2	0	8	3.03333	64.7417	781.911	1172.87	12.0853
50	36	4	2	2	6	2.95789	81.3981	781.904	1172.86	19.953
50	38	2	2	2	6	2.95263	84.2098	781.904	1172.86	20.7398
62	26	2	6	0	4	3.05056	67.9453	781.884	1172.83	14.3538
32	58	0	0	8	2	2.82212	87.1	781.853	1172.78	37.2885
30	60	0	0	8	2	2.80952	87.7029	781.853	1172.78	39.8308
28	62	0	0	8	2	2.79717	86.8669	781.853	1172.78	42.4095
26	64	0	0	8	2	2.78505	87.9998	781.853	1172.78	45.0182
24	66	0	0	8	2	2.77315	87.9998	781.853	1172.78	47.652
22	68	0	0	8	2	2.76147	87.4253	781.853	1172.78	50.307
20	70	0	0	8	2	2.75	87.4566	781.853	1172.78	52.9799
18	72	0	0	8	2	2.73874	87.4566	781.853	1172.78	55.6683
16	74	0	0	8	2	2.72768	89.0898	781.853	1172.78	58.3699
14	76	0	0	8	2	2.71681	90.2821	781.853	1172.78	61.0831
12	78	0	0	8	2	2.70614	90.2821	781.853	1172.78	63.8062
10	80	0	0	8	2	2.69565	84.3237	781.853	1172.78	66.5382
8	82	0	0	8	2	2.68534	87.5226	781.853	1172.78	69.2779
6	84	0	0	8	2	2.67521	87.5226	781.853	1172.78	72.0245
4	86	0	0	8	2	2.66525	86.8092	781.853	1172.78	74.7772
2	88	0	0	8	2	2.65546	86.5458	781.853	1172.78	77.5354
0	90	0	0	8	2	2.64583	90.8885	781.853	1172.78	80.2985
62	24	4	0	8	2	3.05618	53.2839	781.746	1172.62	7.07242
60	26	4	0	8	2	3.03889	54.8326	781.746	1172.62	6.7832
36	54	0	0	10	0	2.84804	84.5478	781.532	1172.3	31.5961
34	56	0	0	10	0	2.83495	84.5478	781.532	1172.3	34.0935
56	30	4	0	8	2	3.00543	62.2137	781.501	1172.25	9.27515
64	22	4	2	8	0	3.07386	70.9609	781.488	1172.23	6.78324
66	22	2	10	0	0	3.08621	72.5925	781.484	1172.23	16.5533
64	24	2	10	0	0	3.06818	72.2883	781.484	1172.23	16.6736
62	28	0	6	4	0	3.04494	72.7503	781.457	1172.19	11.0457
50	36	4	4	2	4	2.95789	84.2401	781.451	1172.18	19.7515
50	38	2	4	2	4	2.95263	87.0518	781.451	1172.18	20.546
62	28	0	4	4	2	3.04494	65.2666	781.436	1172.15	10.296
58	32	0	2	4	4	3.01099	83.721	781.365	1172.05	12.084
62	24	4	2	8	0	3.05618	70.588	781.313	1171.97	7.07242
60	26	4	2	8	0	3.03889	72.1367	781.313	1171.97	6.7832
62	26	2	10	0	0	3.05056	72.0813	781.309	1171.96	16.5533
48	38	4	0	2	8	2.94271	57.0055	781.212	1171.82	22.5849
48	40	2	0	2	8	2.9375	58.3472	781.212	1171.82	23.5412
64	22	4	4	0	6	3.07386	67.0318	781.148	1171.72	10.8639
56	30	4	2	8	0	3.00543	73.9744	781.068	1171.6	9.27515
62	24	4	4	0	6	3.05618	66.6589	780.973	1171.46	11.7486
48	38	4	2	2	6	2.94271	84.5049	780.924	1171.39	22.0472
48	40	2	2	2	6	2.9375	85.8466	780.924	1171.39	23.0258
56	32	2	0	2	8	3	53.4285	780.887	1171.33	15.8124
54	32	4	0	2	8	2.98925	54.8649	780.887	1171.33	16.913
66	22	2	6	2	2	3.08621	66.0447	780.807	1171.21	12.8845
64	24	2	6	2	2	3.06818	65.7405	780.807	1171.21	13.0387
40	50	0	2	8	0	2.875	101.532	780.709	1171.06	27.6807
54	34	2	0	2	8	2.98387	54.7087	780.684	1171.03	17.3799
62	26	2	6	2	2	3.05056	65.5335	780.632	1170.95	12.8845
56	32	2	2	2	6	3	79.6565	780.598	1170.9	15.0344
54	32	4	2	2	6	2.98925	81.0929	780.598	1170.9	16.188
60	28	2	6	0	4	3.03333	67.6387	780.587	1170.88	15.166
68	22	0	0	6	4	3.09884	56.5447	780.542	1170.81	8.60328
48	38	4	4	2	4	2.94271	87.3468	780.471	1170.71	21.865
48	40	2	4	2	4	2.9375	88.6886	780.471	1170.71	22.8515
64	22	4	0	0	10	3.07386	52.9435	780.465	1170.7	6.78406
40	50	0	0	8	2	2.875	75.1245	780.427	1170.64	27.6807
54	34	2	2	2	6	2.98387	80.9367	780.395	1170.59	16.6751
38	52	0	2	8	0	2.86139	112.991	780.306	1170.46	29.9711
62	24	4	0	0	10	3.05618	52.5706	780.29	1170.44	8.12586
60	30	0	2	6	2	3.02778	59.6601	780.218	1170.33	8.60289
64	22	4	2	0	8	3.07386	64.538	780.177	1170.26	8.60369
56	32	2	4	2	4	3	82.4984	780.146	1170.22	14.766
54	32	4	4	2	4	2.98925	83.9348	780.146	1170.22	15.939
72	18	0	6	0	4	3.1369	64.6261	780.074	1170.11	10.489
38	52	0	0	8	2	2.86139	86.5831	780.025	1170.04	29.9711
60	28	2	10	0	0	3.03333	70.7311	780.011	1170.02	16.6736
62	24	4	2	0	8	3.05618	64.1651	780.002	1170	9.69689
54	34	2	4	2	4	2.98387	83.7786	779.943	1169.91	16.4335
78	12	0	4	0	6	3.19753	50.3575	779.923	1169.88	6.32519
64	26	0	6	4	0	3.0625	71.7318	779.827	1169.74	11.2257
64	26	0	4	4	2	3.0625	64.2481	779.806	1169.71	10.4888
58	28	4	4	0	6	3.02198	73.2723	779.676	1169.51	15.0357
60	28	2	6	2	2	3.03333	65.2269	779.335	1169	13.0387
44	46	0	2	8	0	2.90306	88.8478	779.101	1168.65	23.4553
42	48	0	2	8	0	2.88889	101.817	779.101	1168.65	25.4987
72	18	0	0	0	10	3.1369	53.9931	779.096	1168.64	4.90064
36	54	0	2	8	0	2.84804	112.258	779.085	1168.63	32.3468
34	56	0	2	8	0	2.83495	112.258	779.085	1168.63	34.7904
58	28	4	0	0	10	3.02198	53.5612	778.993	1168.49	12.4126
66	24	0	6	4	0	3.08046	71.7043	778.919	1168.38	11.0457
66	24	0	4	4	2	3.08046	64.2206	778.898	1168.35	10.296
64	22	4	6	0	4	3.07386	67.8468	778.852	1168.28	13.3425
44	46	0	0	8	2	2.90306	62.44	778.819	1168.23	23.4553
42	48	0	0	8	2	2.88889	75.4093	778.819	1168.23	25.4987
72	18	0	2	0	8	3.1369	55.7987	778.807	1168.21	6.16597
36	54	0	0	8	2	2.84804	85.8504	778.803	1168.21	32.3468
34	56	0	0	8	2	2.83495	85.8504	778.803	1168.21	34.7904
58	28	4	2	0	8	3.02198	63.1484	778.704	1168.06	13.4935
78	12	0	6	0	4	3.19753	54.0196	778.683	1168.02	8.94472
62	24	4	6	0	4	3.05618	67.474	778.677	1168.02	14.0723
68	22	0	0	4	6	3.09884	54.6065	778.676	1168.01	10.4894
64	22	4	10	0	0	3.07386	72.3831	778.277	1167.42	16.419
62	24	4	10	0	0	3.05618	72.0102	778.102	1167.15	16.1109
52	32	6	0	10	0	2.97872	64.4103	777.961	1166.94	11.9198
60	30	0	8	2	0	3.02778	72.9564	777.704	1166.56	14.213
64	22	4	6	2	2	3.07386	65.435	777.6	1166.4	13.3421
58	30	2	0	10	0	3.01648	59.9851	777.51	1166.27	6.16569
62	24	4	6	2	2	3.05618	65.0622	777.425	1166.14	13.4914
58	28	4	6	0	4	3.02198	73.5192	777.38	1166.07	15.8119
60	26	4	4	0	6	3.03889	67.9166	776.963	1165.44	13.1927
74	16	0	8	0	2	3.15663	67.2954	776.862	1165.29	12.2476
58	28	4	10	0	0	3.02198	72.0384	776.805	1165.21	16.9573
46	38	6	0	10	0	2.93299	57.4886	776.728	1165.09	15.0359
56	30	4	4	0	6	3.00543	74.679	776.718	1165.08	16.6742
66	22	2	8	0	2	3.08621	67.8518	776.712	1165.07	15.5567
64	24	2	8	0	2	3.06818	67.5476	776.712	1165.07	15.6847
58	30	2	0	8	2	3.01648	60.747	776.617	1164.93	7.61681
50	34	6	0	10	0	2.96316	62.6435	776.56	1164.84	12.4126
62	26	2	8	0	2	3.05056	67.3406	776.537	1164.81	15.5567
52	34	4	0	6	4	2.9734	67.5346	776.345	1164.52	15.036
52	36	2	0	6	4	2.96809	68.9721	776.345	1164.52	15.8144
60	26	4	0	0	10	3.03889	53.8282	776.28	1164.42	10.1018
58	30	2	2	8	0	3.01648	71.0704	776.184	1164.28	7.61681
58	28	4	6	2	2	3.02198	71.1074	776.128	1164.19	13.7846
56	30	4	0	0	10	3.00543	53.5306	776.035	1164.05	14.9034
60	30	0	4	6	0	3.02778	66.2388	776.016	1164.02	9.05592
60	26	4	2	0	8	3.03889	65.4227	775.991	1163.99	11.4038
76	14	0	4	0	6	3.17683	53.5966	775.937	1163.91	6.4809
56	30	4	2	0	8	3.00543	64.5551	775.746	1163.62	15.8149
48	36	6	0	10	0	2.94792	63.8508	775.581	1163.37	13.4934
68	22	0	2	4	4	3.09884	66.3157	775.517	1163.28	10.4889
60	28	2	8	0	2	3.03333	67.034	775.24	1162.86	15.6846
74	16	0	4	0	6	3.15663	63.0869	775.188	1162.78	6.78259
50	36	4	0	6	4	2.95789	65.7165	774.944	1162.42	17.2649
50	38	2	0	6	4	2.95263	68.5282	774.944	1162.42	18.2795
78	12	0	2	0	8	3.19753	45.4021	774.807	1162.21	4.00101
78	12	0	10	0	0	3.19753	62.5065	774.716	1162.07	13.7565
76	14	0	6	0	4	3.17683	57.2588	774.697	1162.04	9.27373
60	26	4	6	0	4	3.03889	68.1635	774.667	1162	15.2986
46	44	0	6	2	2	2.91753	88.7765	774.543	1161.81	26.1176
52	34	4	0	4	6	2.9734	65.5965	774.48	1161.72	16.6758
52	36	2	0	4	6	2.96809	67.034	774.48	1161.72	17.3809
56	30	4	6	0	4	3.00543	74.9259	774.422	1161.63	16.6742
62	28	0	0	6	4	3.04494	57.2149	774.303	1161.45	8.36704
46	44	0	10	0	0	2.91753	90.8362	774.24	1161.36	28.6029
60	26	4	10	0	0	3.03889	73.1657	774.091	1161.14	16.2957
48	38	4	0	6	4	2.94271	68.0473	773.965	1160.95	18.2778
48	40	2	0	6	4	2.9375	69.389	773.965	1160.95	19.7507
46	44	0	4	0	6	2.91753	90.7744	773.875	1160.81	27.7512
56	30	4	10	0	0	3.00543	74.9546	773.847	1160.77	18.0433
56	32	2	0	6	4	3	63.6688	773.639	1160.46	11.4032
54	32	4	0	6	4	2.98925	65.4112	773.639	1160.46	12.8861
78	12	0	0	0	10	3.19753	43.0896	773.621	1160.43	2.82985
52	32	6	2	8	0	2.97872	75.5217	773.548	1160.32	13.4935
32	58	0	6	2	2	2.82212	114.143	773.521	1160.28	40.0803
30	60	0	6	2	2	2.80952	114.746	773.521	1160.28	42.4558
28	62	0	6	2	2	2.79717	113.91	773.521	1160.28	44.8839
26	64	0	6	2	2	2.78505	114.544	773.521	1160.28	47.3565
24	66	0	6	2	2	2.77315	114.544	773.521	1160.28	49.8669
22	68	0	6	2	2	2.76147	113.969	773.521	1160.28	52.4098
20	70	0	6	2	2	2.75	114.001	773.521	1160.28	54.9807
18	72	0	6	2	2	2.73874	114.001	773.521	1160.28	57.5757
16	74	0	6	2	2	2.72768	115.634	773.521	1160.28	60.1918
14	76	0	6	2	2	2.71681	116.826	773.521	1160.28	62.8263
12	78	0	6	2	2	2.70614	116.826	773.521	1160.28	65.477
10	80	0	6	2	2	2.69565	115.746	773.521	1160.28	68.142
8	82	0	6	2	2	2.68534	113.52	773.521	1160.28	70.8197
6	84	0	6	2	2	2.67521	113.52	773.521	1160.28	73.5087
4	86	0	6	2	2	2.66525	112.806	773.521	1160.28	76.2079
2	88	0	6	2	2	2.65546	112.543	773.521	1160.28	78.916
0	90	0	6	2	2	2.64583	116.886	773.521	1160.28	81.6324
64	22	4	8	0	2	3.07386	68.2517	773.505	1160.26	15.9378
54	34	2	0	6	4	2.98387	65.255	773.436	1160.15	13.493
60	26	4	6	2	2	3.03889	65.7517	773.414	1160.12	13.3421
62	24	4	8	0	2	3.05618	67.8788	773.33	1160	16.063
60	28	2	2	6	2	3.03333	65.8804	773.301	1159.95	8.12452
52	32	6	0	8	2	2.97872	64.7747	773.267	1159.9	13.4935
32	58	0	10	0	0	2.82212	116.023	773.218	1159.83	41.7424
30	60	0	10	0	0	2.80952	116.626	773.218	1159.83	44.0283
28	62	0	10	0	0	2.79717	115.79	773.218	1159.83	46.3742
26	64	0	10	0	0	2.78505	116.423	773.218	1159.83	48.7713
24	66	0	10	0	0	2.77315	116.423	773.218	1159.83	51.2124
22	68	0	10	0	0	2.76147	115.849	773.218	1159.83	53.6916
20	70	0	10	0	0	2.75	115.88	773.218	1159.83	56.2039
18	72	0	10	0	0	2.73874	115.88	773.218	1159.83	58.7449
16	74	0	10	0	0	2.72768	117.513	773.218	1159.83	61.3111
14	76	0	10	0	0	2.71681	118.706	773.218	1159.83	63.8995
12	78	0	10	0	0	2.70614	118.706	773.218	1159.83	66.5074
10	80	0	10	0	0	2.69565	117.626	773.218	1159.83	69.1327
8	82	0	10	0	0	2.68534	115.399	773.218	1159.83	71.7735
6	84	0	10	0	0	2.67521	115.399	773.218	1159.83	74.428
4	86	0	10	0	0	2.66525	114.686	773.218	1159.83	77.095
2	88	0	10	0	0	2.65546	114.423	773.218	1159.83	79.7731
0	90	0	10	0	0	2.64583	118.765	773.218	1159.83	82.4612
46	44	0	0	0	10	2.91753	52.5873	773.192	1159.79	28.6029
56	30	4	6	2	2	3.00543	72.5141	773.17	1159.75	14.7658
50	36	4	0	4	6	2.95789	63.7783	773.079	1159.62	18.8181
50	38	2	0	4	6	2.95263	66.59	773.079	1159.62	19.6504
46	44	0	2	0	8	2.91753	78.2589	772.903	1159.35	28.0379
74	16	0	6	0	4	3.15663	66.6953	772.893	1159.34	9.48702
32	58	0	4	0	6	2.82212	116.318	772.852	1159.28	41.1634
30	60	0	4	0	6	2.80952	116.921	772.852	1159.28	43.4798
28	62	0	4	0	6	2.79717	116.085	772.852	1159.28	45.8537
26	64	0	4	0	6	2.78505	116.719	772.852	1159.28	48.2767
24	66	0	4	0	6	2.77315	116.719	772.852	1159.28	50.7416
22	68	0	4	0	6	2.76147	116.144	772.852	1159.28	53.2428
20	70	0	4	0	6	2.75	116.175	772.852	1159.28	55.7752
18	72	0	4	0	6	2.73874	116.175	772.852	1159.28	58.3349
16	74	0	4	0	6	2.72768	117.809	772.852	1159.28	60.9184
14	76	0	4	0	6	2.71681	119.001	772.852	1159.28	63.5228
12	78	0	4	0	6	2.70614	119.001	772.852	1159.28	66.1456
10	80	0	4	0	6	2.69565	117.921	772.852	1159.28	68.7847
8	82	0	4	0	6	2.68534	115.695	772.852	1159.28	71.4383
6	84	0	4	0	6	2.67521	115.695	772.852	1159.28	74.1049
4	86	0	4	0	6	2.66525	114.981	772.852	1159.28	76.7831
2	88	0	4	0	6	2.65546	114.718	772.852	1159.28	79.4716
0	90	0	4	0	6	2.64583	118.349	772.852	1159.28	82.1696
64	26	0	0	6	4	3.0625	55.9394	772.672	1159.01	8.60324
62	28	0	0	4	6	3.04494	55.2768	772.438	1158.66	11.0457
46	38	6	2	8	0	2.93299	73.3732	772.315	1158.47	16.5553
66	22	2	8	2	0	3.08621	73.4812	772.259	1158.39	13.7844
64	24	2	8	2	0	3.06818	73.1769	772.259	1158.39	13.9287
32	58	0	0	0	10	2.82212	85.7609	772.169	1158.25	41.7424
30	60	0	0	0	10	2.80952	86.3638	772.169	1158.25	44.0283
28	62	0	0	0	10	2.79717	85.5278	772.169	1158.25	46.3742
26	64	0	0	0	10	2.78505	86.1614	772.169	1158.25	48.7713
24	66	0	0	0	10	2.77315	86.1614	772.169	1158.25	51.2124
22	68	0	0	0	10	2.76147	85.5869	772.169	1158.25	53.6916
20	70	0	0	0	10	2.75	85.6182	772.169	1158.25	56.2039
18	72	0	0	0	10	2.73874	85.6182	772.169	1158.25	58.7449
16	74	0	0	0	10	2.72768	89.0243	772.169	1158.25	61.3111
14	76	0	0	0	10	2.71681	90.2166	772.169	1158.25	63.8995
12	78	0	0	0	10	2.70614	90.2166	772.169	1158.25	66.5074
10	80	0	0	0	10	2.69565	84.2582	772.169	1158.25	69.1327
8	82	0	0	0	10	2.68534	87.4571	772.169	1158.25	71.7735
6	84	0	0	0	10	2.67521	87.4571	772.169	1158.25	74.428
4	86	0	0	0	10	2.66525	86.7437	772.169	1158.25	77.095
2	88	0	0	0	10	2.65546	86.4804	772.169	1158.25	79.7731
0	90	0	0	0	10	2.64583	90.9214	772.169	1158.25	82.4612
50	34	6	2	8	0	2.96316	73.755	772.148	1158.22	14.2152
48	38	4	0	4	6	2.94271	66.1092	772.099	1158.15	20.3489
48	40	2	0	4	6	2.9375	67.4509	772.099	1158.15	21.6816
40	50	0	6	2	2	2.875	99.6231	772.095	1158.14	31.3404
62	26	2	8	2	0	3.05056	72.97	772.084	1158.13	13.7844
46	38	6	0	8	2	2.93299	57.8531	772.034	1158.05	16.5553
58	28	4	8	0	2	3.02198	73.924	772.033	1158.05	16.31
74	16	0	0	0	10	3.15663	55.309	771.914	1157.87	2.45022
32	58	0	2	0	8	2.82212	111.433	771.881	1157.82	41.3573
30	60	0	2	0	8	2.80952	112.035	771.881	1157.82	43.6634
28	62	0	2	0	8	2.79717	111.199	771.881	1157.82	46.0278
26	64	0	2	0	8	2.78505	111.833	771.881	1157.82	48.4421
24	66	0	2	0	8	2.77315	111.833	771.881	1157.82	50.899
22	68	0	2	0	8	2.76147	111.258	771.881	1157.82	53.3928
20	70	0	2	0	8	2.75	111.29	771.881	1157.82	55.9185
18	72	0	2	0	8	2.73874	111.29	771.881	1157.82	58.4719
16	74	0	2	0	8	2.72768	114.696	771.881	1157.82	61.0496
14	76	0	2	0	8	2.71681	115.888	771.881	1157.82	63.6486
12	78	0	2	0	8	2.70614	115.888	771.881	1157.82	66.2664
10	80	0	2	0	8	2.69565	114.808	771.881	1157.82	68.9009
8	82	0	2	0	8	2.68534	112.582	771.881	1157.82	71.5502
6	84	0	2	0	8	2.67521	112.582	771.881	1157.82	74.2128
4	86	0	2	0	8	2.66525	111.869	771.881	1157.82	76.8872
2	88	0	2	0	8	2.65546	111.605	771.881	1157.82	79.5722
0	90	0	2	0	8	2.64583	116.046	771.881	1157.82	82.2669
50	34	6	0	8	2	2.96316	63.008	771.866	1157.8	14.2152
58	30	2	4	0	6	3.01648	71.8237	771.834	1157.75	15.8119
40	50	0	10	0	0	2.875	101.683	771.793	1157.69	33.4398
56	32	2	0	4	6	3	61.7307	771.774	1157.66	13.492
54	32	4	0	4	6	2.98925	63.4731	771.774	1157.66	14.7665
66	24	0	0	6	4	3.08046	55.912	771.765	1157.65	8.36705
38	52	0	6	2	2	2.86139	111.082	771.693	1157.54	33.3806
74	16	0	2	0	8	3.15663	57.1562	771.626	1157.44	4.24306
46	44	0	6	0	4	2.91753	91.1776	771.579	1157.37	27.7512
54	34	2	0	4	6	2.98387	63.3169	771.571	1157.36	15.299
40	50	0	4	0	6	2.875	101.621	771.427	1157.14	32.7142
38	52	0	10	0	0	2.86139	113.141	771.39	1157.08	35.3591
70	16	4	10	0	0	3.12941	66.222	771.337	1157.01	16.3104
52	34	4	2	4	4	2.9734	85.5315	771.321	1156.98	16.1889
52	36	2	2	4	4	2.96809	86.969	771.321	1156.98	16.9144
48	36	6	2	8	0	2.94792	74.9622	771.168	1156.75	15.1681
58	30	2	0	0	10	3.01648	52.1127	771.15	1156.73	13.3449
38	52	0	4	0	6	2.86139	113.08	771.024	1156.54	34.6737
48	36	6	0	8	2	2.94792	64.2153	770.886	1156.33	15.1681
58	30	2	2	0	8	3.01648	61.6999	770.862	1156.29	14.3557
76	14	0	2	0	8	3.17683	48.6413	770.821	1156.23	3.74193
70	20	0	10	0	0	3.11765	70.3371	770.812	1156.22	16.7943
64	26	0	0	4	6	3.0625	54.0013	770.807	1156.21	11.2257
60	28	2	8	2	0	3.03333	72.6633	770.786	1156.18	13.9287
66	22	2	2	6	2	3.08621	65.0128	770.763	1156.14	7.87467
64	24	2	2	6	2	3.06818	65.8259	770.763	1156.14	8.12455
40	50	0	0	0	10	2.875	71.0638	770.744	1156.12	33.4398
76	14	0	10	0	0	3.17683	65.7764	770.73	1156.09	14.8997
76	14	0	0	0	10	3.17683	46.3288	770.636	1155.95	1.41493
62	26	2	2	6	2	3.05056	65.619	770.588	1155.88	7.87465
32	58	0	6	0	4	2.82212	116.721	770.556	1155.83	41.1634
30	60	0	6	0	4	2.80952	117.324	770.556	1155.83	43.4798
28	62	0	6	0	4	2.79717	116.488	770.556	1155.83	45.8537
26	64	0	6	0	4	2.78505	117.122	770.556	1155.83	48.2767
24	66	0	6	0	4	2.77315	117.122	770.556	1155.83	50.7416
22	68	0	6	0	4	2.76147	116.547	770.556	1155.83	53.2428
20	70	0	6	0	4	2.75	116.579	770.556	1155.83	55.7752
18	72	0	6	0	4	2.73874	116.579	770.556	1155.83	58.3349
16	74	0	6	0	4	2.72768	118.212	770.556	1155.83	60.9184
14	76	0	6	0	4	2.71681	119.404	770.556	1155.83	63.5228
12	78	0	6	0	4	2.70614	119.404	770.556	1155.83	66.1456
10	80	0	6	0	4	2.69565	118.324	770.556	1155.83	68.7847
8	82	0	6	0	4	2.68534	116.098	770.556	1155.83	71.4383
6	84	0	6	0	4	2.67521	116.098	770.556	1155.83	74.1049
4	86	0	6	0	4	2.66525	115.384	770.556	1155.83	76.7831
2	88	0	6	0	4	2.65546	115.121	770.556	1155.83	79.4716
0	90	0	6	0	4	2.64583	118.752	770.556	1155.83	82.1696
60	30	0	0	2	8	3.02778	48.8303	770.501	1155.75	13.3442
44	46	0	6	2	2	2.90306	88.0136	770.487	1155.73	27.6794
42	48	0	6	2	2	2.88889	100.983	770.487	1155.73	29.431
36	54	0	6	2	2	2.84804	110.349	770.472	1155.71	35.5291
34	56	0	6	2	2	2.83495	112.894	770.472	1155.71	37.7673
40	50	0	2	0	8	2.875	96.7355	770.456	1155.68	32.9579
46	44	0	8	0	2	2.91753	90.603	770.449	1155.67	28.0379
60	30	0	6	4	0	3.02778	67.4795	770.408	1155.61	11.5763
60	30	0	4	4	2	3.02778	60.5639	770.387	1155.58	10.8632
38	52	0	0	0	10	2.86139	82.5224	770.341	1155.51	35.3591
60	30	0	2	2	6	3.02778	60.0658	770.213	1155.32	13.342
44	46	0	10	0	0	2.90306	90.0733	770.184	1155.28	30.0358
42	48	0	10	0	0	2.88889	103.043	770.184	1155.28	31.6573
36	54	0	10	0	0	2.84804	112.052	770.169	1155.25	37.394
34	56	0	10	0	0	2.83495	114.773	770.169	1155.25	39.5268
58	28	4	2	6	2	3.02198	71.9171	770.094	1155.14	9.27444
38	52	0	2	0	8	2.86139	108.194	770.053	1155.08	34.9037
46	36	8	0	10	0	2.93814	62.625	770.048	1155.07	13.931
50	36	4	2	4	4	2.95789	83.7133	769.92	1154.88	18.3881
50	38	2	2	4	4	2.95263	86.525	769.92	1154.88	19.239
66	24	0	0	4	6	3.08046	53.9738	769.899	1154.85	10.678
50	32	8	0	10	0	2.96842	65.3181	769.881	1154.82	11.7505
48	34	8	0	10	0	2.95312	66.9075	769.881	1154.82	12.5725
44	46	0	4	0	6	2.90306	90.0115	769.819	1154.73	29.2259
42	48	0	4	0	6	2.88889	102.981	769.819	1154.73	30.8899
36	54	0	4	0	6	2.84804	112.347	769.803	1154.7	36.7466
34	56	0	4	0	6	2.83495	115.068	769.803	1154.7	38.9149
60	30	0	4	2	4	3.02778	62.9078	769.76	1154.64	13.0388
46	40	4	0	10	0	2.92784	61.9069	769.603	1154.4	16.5556
46	42	2	0	10	0	2.92268	62.21	769.603	1154.4	18.3876
44	42	4	0	10	0	2.91327	62.195	769.603	1154.4	18.4961
44	44	2	0	10	0	2.90816	62.4981	769.603	1154.4	20.3501
42	44	4	0	10	0	2.89899	57.509	769.603	1154.4	20.643
58	30	2	6	0	4	3.01648	72.2268	769.538	1154.31	15.8119
32	58	0	8	0	2	2.82212	115.79	769.426	1154.14	41.3573
30	60	0	8	0	2	2.80952	116.393	769.426	1154.14	43.6634
28	62	0	8	0	2	2.79717	115.557	769.426	1154.14	46.0278
26	64	0	8	0	2	2.78505	116.19	769.426	1154.14	48.4421
24	66	0	8	0	2	2.77315	116.19	769.426	1154.14	50.899
22	68	0	8	0	2	2.76147	115.616	769.426	1154.14	53.3928
20	70	0	8	0	2	2.75	115.647	769.426	1154.14	55.9185
18	72	0	8	0	2	2.73874	115.647	769.426	1154.14	58.4719
16	74	0	8	0	2	2.72768	117.28	769.426	1154.14	61.0496
14	76	0	8	0	2	2.71681	118.472	769.426	1154.14	63.6486
12	78	0	8	0	2	2.70614	118.472	769.426	1154.14	66.2664
10	80	0	8	0	2	2.69565	117.393	769.426	1154.14	68.9009
8	82	0	8	0	2	2.68534	115.166	769.426	1154.14	71.5502
6	84	0	8	0	2	2.67521	115.166	769.426	1154.14	74.2128
4	86	0	8	0	2	2.66525	114.453	769.426	1154.14	76.8872
2	88	0	8	0	2	2.65546	114.189	769.426	1154.14	79.5722
0	90	0	8	0	2	2.64583	118.532	769.426	1154.14	82.2669
60	26	4	8	0	2	3.03889	68.5683	769.32	1153.98	15.9377
62	28	0	2	4	4	3.04494	66.7289	769.278	1153.92	10.296
78	12	0	8	0	2	3.19753	56.7649	769.172	1153.76	11.6622
44	46	0	0	0	10	2.90306	51.8243	769.136	1153.7	30.0358
42	48	0	0	0	10	2.88889	72.4237	769.136	1153.7	31.6573
40	50	0	6	0	4	2.875	102.024	769.131	1153.7	32.7142
36	54	0	0	0	10	2.84804	81.7897	769.12	1153.68	37.394
34	56	0	0	0	10	2.83495	84.5113	769.12	1153.68	39.5268
60	28	2	4	6	0	3.03333	72.4592	769.099	1153.65	8.60278
56	30	4	8	0	2	3.00543	75.3307	769.075	1153.61	17.1473
64	22	4	8	2	0	3.07386	73.881	769.052	1153.58	14.2131
58	30	2	10	0	0	3.01648	70.3458	768.962	1153.44	17.2631
48	38	4	2	4	4	2.94271	86.0442	768.94	1153.41	19.9519
48	40	2	2	4	4	2.9375	87.3859	768.94	1153.41	21.3094
62	24	4	8	2	0	3.05618	73.5081	768.877	1153.32	14.3534
44	46	0	2	0	8	2.90306	77.496	768.847	1153.27	29.4983
42	48	0	2	0	8	2.88889	98.0953	768.847	1153.27	31.1478
36	54	0	2	0	8	2.84804	107.461	768.832	1153.25	36.9637
34	56	0	2	0	8	2.83495	110.183	768.832	1153.25	39.1199
38	52	0	6	0	4	2.86139	113.483	768.729	1153.09	34.6737
56	32	2	2	4	4	3	81.6657	768.615	1152.92	12.8854
54	32	4	2	4	4	2.98925	83.4081	768.615	1152.92	14.2145
46	44	0	2	6	2	2.91753	89.0089	768.51	1152.76	22.8501
54	34	2	2	4	4	2.98387	83.2518	768.412	1152.62	14.7669
58	30	2	6	2	2	3.01648	69.815	768.285	1152.43	13.7846
40	50	0	8	0	2	2.875	101.45	768.001	1152	32.9579
64	26	0	2	4	4	3.0625	65.7105	767.648	1151.47	10.4888
38	52	0	8	0	2	2.86139	112.908	767.598	1151.4	34.9037
58	28	4	8	2	0	3.02198	74.5799	767.58	1151.37	14.6293
64	22	4	2	6	2	3.07386	65.6767	767.556	1151.33	8.60304
44	46	0	6	0	4	2.90306	90.4146	767.523	1151.28	29.2259
42	48	0	6	0	4	2.88889	103.384	767.523	1151.28	30.8899
36	54	0	6	0	4	2.84804	112.75	767.507	1151.26	36.7466
34	56	0	6	0	4	2.83495	115.472	767.507	1151.26	38.9149
32	58	0	2	6	2	2.82212	112.906	767.487	1151.23	38.032
30	60	0	2	6	2	2.80952	113.509	767.487	1151.23	40.5277
28	62	0	2	6	2	2.79717	112.673	767.487	1151.23	43.0646
26	64	0	2	6	2	2.78505	113.806	767.487	1151.23	45.6359
24	66	0	2	6	2	2.77315	113.806	767.487	1151.23	48.236
22	68	0	2	6	2	2.76147	113.231	767.487	1151.23	50.8605
20	70	0	2	6	2	2.75	113.263	767.487	1151.23	53.5058
18	72	0	2	6	2	2.73874	113.263	767.487	1151.23	56.169
16	74	0	2	6	2	2.72768	114.896	767.487	1151.23	58.8477
14	76	0	2	6	2	2.71681	116.088	767.487	1151.23	61.5398
12	78	0	2	6	2	2.70614	116.088	767.487	1151.23	64.2436
10	80	0	2	6	2	2.69565	115.008	767.487	1151.23	66.9577
8	82	0	2	6	2	2.68534	112.782	767.487	1151.23	69.6809
6	84	0	2	6	2	2.67521	112.782	767.487	1151.23	72.4123
4	86	0	2	6	2	2.66525	112.068	767.487	1151.23	75.1508
2	88	0	2	6	2	2.65546	111.805	767.487	1151.23	77.8957
0	90	0	2	6	2	2.64583	116.148	767.487	1151.23	80.6464
62	24	4	2	6	2	3.05618	65.3038	767.381	1151.07	8.83284
60	26	4	2	6	2	3.03889	66.5614	767.381	1151.07	8.60301
56	30	4	2	6	2	3.00543	73.3726	767.136	1150.7	10.6784
66	24	0	2	4	4	3.08046	65.683	766.74	1150.11	10.296
32	54	4	0	10	0	2.83173	56.8154	766.614	1149.92	32.9598
32	56	2	0	10	0	2.82692	85.317	766.614	1149.92	34.7331
30	56	4	0	10	0	2.81905	57.8986	766.614	1149.92	35.5866
30	58	2	0	10	0	2.81429	86.4003	766.614	1149.92	37.3423
28	58	4	0	10	0	2.8066	57.8986	766.614	1149.92	38.2423
28	60	2	0	10	0	2.80189	86.4003	766.614	1149.92	39.9814
26	60	4	0	10	0	2.79439	57.0627	766.614	1149.92	40.9211
26	62	2	0	10	0	2.78972	85.5644	766.614	1149.92	42.6449
24	62	4	0	10	0	2.78241	58.1955	766.614	1149.92	43.6189
24	64	2	0	10	0	2.77778	86.6972	766.614	1149.92	45.3283
22	64	4	0	10	0	2.77064	57.621	766.614	1149.92	46.3323
22	66	2	0	10	0	2.76606	86.1227	766.614	1149.92	48.0285
20	66	4	0	10	0	2.75909	57.621	766.614	1149.92	49.0588
20	68	2	0	10	0	2.75455	86.1541	766.614	1149.92	50.7427
18	68	4	0	10	0	2.74775	57.6524	766.614	1149.92	51.7962
18	70	2	0	10	0	2.74324	86.1541	766.614	1149.92	53.4687
16	70	4	0	10	0	2.73661	57.6524	766.614	1149.92	54.5429
16	72	2	0	10	0	2.73214	87.7872	766.614	1149.92	56.2049
14	72	4	0	10	0	2.72566	60.4779	766.614	1149.92	57.2977
14	74	2	0	10	0	2.72124	88.9796	766.614	1149.92	58.9498
12	74	4	0	10	0	2.71491	60.4779	766.614	1149.92	60.0592
12	76	2	0	10	0	2.71053	88.9796	766.614	1149.92	61.7023
10	76	4	0	10	0	2.70435	60.4779	766.614	1149.92	62.8268
10	78	2	0	10	0	2.7	87.8996	766.614	1149.92	64.4614
8	78	4	0	10	0	2.69397	57.7183	766.614	1149.92	65.5995
8	80	2	0	10	0	2.68966	86.22	766.614	1149.92	67.2262
6	80	4	0	10	0	2.68376	57.7183	766.614	1149.92	68.3769
6	82	2	0	10	0	2.67949	86.22	766.614	1149.92	69.9962
4	82	4	0	10	0	2.67373	57.7183	766.614	1149.92	71.1583
4	84	2	0	10	0	2.66949	85.5067	766.614	1149.92	72.7706
2	84	4	0	10	0	2.66387	56.9652	766.614	1149.92	73.9432
2	86	2	0	10	0	2.65966	85.2433	766.614	1149.92	75.5491
0	86	4	0	10	0	2.65417	56.7416	766.614	1149.92	76.7314
0	88	2	0	10	0	2.65	85.3444	766.614	1149.92	78.3312
66	22	2	4	6	0	3.08621	71.5916	766.561	1149.84	8.36722
64	24	2	4	6	0	3.06818	72.4047	766.561	1149.84	8.60281
44	46	0	8	0	2	2.90306	89.8401	766.393	1149.59	29.4983
42	48	0	8	0	2	2.88889	102.809	766.393	1149.59	31.1478
62	26	2	4	6	0	3.05056	72.1977	766.386	1149.58	8.36721
36	54	0	8	0	2	2.84804	111.818	766.377	1149.57	36.9637
34	56	0	8	0	2	2.83495	114.54	766.377	1149.57	39.1199
66	22	2	0	2	8	3.08621	51.1345	766.101	1149.15	7.87537
64	24	2	0	2	8	3.06818	53.1468	766.101	1149.15	8.60357
40	50	0	2	6	2	2.875	100.931	766.062	1149.09	28.6744
46	44	0	8	2	0	2.91753	91.2589	765.995	1148.99	26.573
62	26	2	0	2	8	3.05056	52.9398	765.926	1148.89	10.1011
58	28	4	4	6	0	3.02198	73.5224	765.892	1148.84	9.69614
66	22	2	2	2	6	3.08621	66.5359	765.812	1148.72	9.90058
64	24	2	2	2	6	3.06818	66.2317	765.812	1148.72	10.4891
70	16	4	8	0	2	3.12941	61.2662	765.714	1148.57	13.7852
38	52	0	2	6	2	2.86139	112.389	765.659	1148.49	30.8912
62	26	2	2	2	6	3.05056	66.0247	765.638	1148.46	11.7487
46	36	8	2	8	0	2.93814	74.2012	765.636	1148.45	15.5586
52	32	6	10	0	0	2.97872	75.0877	765.612	1148.42	18.8217
40	46	4	0	10	0	2.885	45.3203	765.547	1148.32	22.9382
42	46	2	0	10	0	2.89394	74.1068	765.547	1148.32	22.4979
40	48	2	0	10	0	2.88	73.822	765.547	1148.32	24.7829
38	48	4	0	10	0	2.87129	56.7788	765.547	1148.32	25.3417
50	32	8	2	8	0	2.96842	72.1212	765.468	1148.2	13.6409
48	34	8	2	8	0	2.95312	73.7106	765.468	1148.2	14.3551
66	22	2	4	2	4	3.08621	69.3778	765.36	1148.04	12.2483
64	24	2	4	2	4	3.06818	69.0736	765.36	1148.04	12.7282
46	36	8	0	8	2	2.93814	62.9895	765.354	1148.03	15.5586
52	32	6	4	0	6	2.97872	75.9203	765.311	1147.97	19.341
46	40	4	2	8	0	2.92784	84.8883	765.19	1147.79	17.9468
46	42	2	2	8	0	2.92268	85.5888	765.19	1147.79	19.6496
44	42	4	2	8	0	2.91327	85.1764	765.19	1147.79	19.7511
44	44	2	2	8	0	2.90816	85.8769	765.19	1147.79	21.4971
42	44	4	2	8	0	2.89899	80.4904	765.19	1147.79	21.7746
70	20	0	8	0	2	3.11765	64.7719	765.189	1147.78	14.3544
50	32	8	0	8	2	2.96842	65.6826	765.186	1147.78	13.6409
48	34	8	0	8	2	2.95312	67.272	765.186	1147.78	14.3551
76	14	0	8	0	2	3.17683	59.7351	765.186	1147.78	12.0831
62	26	2	4	2	4	3.05056	68.8666	765.185	1147.78	12.5702
32	58	0	8	2	0	2.82212	116.269	764.973	1147.46	40.3786
30	60	0	8	2	0	2.80952	116.871	764.973	1147.46	42.7375
28	62	0	8	2	0	2.79717	116.035	764.973	1147.46	45.1504
26	64	0	8	2	0	2.78505	116.669	764.973	1147.46	47.6092
24	66	0	8	2	0	2.77315	116.669	764.973	1147.46	50.107
22	68	0	8	2	0	2.76147	116.094	764.973	1147.46	52.6383
20	70	0	8	2	0	2.75	116.126	764.973	1147.46	55.1985
18	72	0	8	2	0	2.73874	116.126	764.973	1147.46	57.7837
16	74	0	8	2	0	2.72768	117.759	764.973	1147.46	60.3908
14	76	0	8	2	0	2.71681	118.951	764.973	1147.46	63.017
12	78	0	8	2	0	2.70614	118.951	764.973	1147.46	65.66
10	80	0	8	2	0	2.69565	117.871	764.973	1147.46	68.3179
8	82	0	8	2	0	2.68534	115.645	764.973	1147.46	70.989
6	84	0	8	2	0	2.67521	115.645	764.973	1147.46	73.6718
4	86	0	8	2	0	2.66525	114.932	764.973	1147.46	76.3652
2	88	0	8	2	0	2.65546	114.668	764.973	1147.46	79.068
0	90	0	8	2	0	2.64583	119.011	764.973	1147.46	81.7793
52	32	6	6	2	2	2.97872	73.7554	764.935	1147.4	17.7221
46	40	4	0	8	2	2.92784	62.2714	764.909	1147.36	17.9468
46	42	2	0	8	2	2.92268	62.9719	764.909	1147.36	19.6496
44	42	4	0	8	2	2.91327	62.5595	764.909	1147.36	19.7511
44	44	2	0	8	2	2.90816	63.26	764.909	1147.36	21.4971
42	44	4	0	8	2	2.89899	57.8735	764.909	1147.36	21.7746
60	26	4	8	2	0	3.03889	74.1977	764.866	1147.3	14.2131
38	50	2	0	10	0	2.86634	85.2805	764.786	1147.18	27.1704
36	50	4	0	10	0	2.85784	56.0461	764.786	1147.18	27.8253
36	52	2	0	10	0	2.85294	84.5478	764.786	1147.18	29.6357
34	52	4	0	10	0	2.84466	56.0461	764.786	1147.18	30.3693
60	28	2	0	2	8	3.03333	55.2086	764.629	1146.94	12.0853
52	32	6	0	0	10	2.97872	55.7857	764.628	1146.94	19.344
56	30	4	8	2	0	3.00543	75.9866	764.621	1146.93	15.5573
44	46	0	2	6	2	2.90306	88.2459	764.454	1146.68	24.6201
42	48	0	2	6	2	2.88889	101.215	764.454	1146.68	26.5741
36	54	0	2	6	2	2.84804	111.656	764.438	1146.66	33.2011
34	56	0	2	6	2	2.83495	111.656	764.438	1146.66	35.5861
60	28	2	2	2	6	3.03333	66.2861	764.34	1146.51	13.0387
52	32	6	2	0	8	2.97872	65.7965	764.34	1146.51	19.7503
46	44	0	4	6	0	2.91753	90.6142	764.308	1146.46	23.0245
50	34	6	10	0	0	2.96316	74.1778	764.211	1146.32	20.7916
58	30	2	8	0	2	3.01648	71.6221	764.191	1146.29	16.31
32	54	4	2	8	0	2.83173	79.7968	764.168	1146.25	33.6801
32	56	2	2	8	0	2.82692	109.237	764.168	1146.25	35.4173
30	56	4	2	8	0	2.81905	80.8801	764.168	1146.25	36.2548
30	58	2	2	8	0	2.81429	110.32	764.168	1146.25	37.9796
28	58	4	2	8	0	2.8066	80.8801	764.168	1146.25	38.8648
28	60	2	2	8	0	2.80189	110.32	764.168	1146.25	40.5773
26	60	4	2	8	0	2.79439	80.0441	764.168	1146.25	41.5035
26	62	2	2	8	0	2.78972	109.484	764.168	1146.25	43.204
24	62	4	2	8	0	2.78241	81.177	764.168	1146.25	44.1657
24	64	2	2	8	0	2.77778	110.617	764.168	1146.25	45.8548
22	64	4	2	8	0	2.77064	80.6025	764.168	1146.25	46.8475
22	66	2	2	8	0	2.76606	110.042	764.168	1146.25	48.5256
20	66	4	2	8	0	2.75909	80.6025	764.168	1146.25	49.5456
20	68	2	2	8	0	2.75455	110.074	764.168	1146.25	51.2135
18	68	4	2	8	0	2.74775	80.6338	764.168	1146.25	52.2575
18	70	2	2	8	0	2.74324	110.074	764.168	1146.25	53.9157
16	70	4	2	8	0	2.73661	80.6338	764.168	1146.25	54.9812
16	72	2	2	8	0	2.73214	111.707	764.168	1146.25	56.6303
14	72	4	2	8	0	2.72566	83.4593	764.168	1146.25	57.715
14	74	2	2	8	0	2.72124	112.899	764.168	1146.25	59.3555
12	74	4	2	8	0	2.71491	83.4593	764.168	1146.25	60.4575
12	76	2	2	8	0	2.71053	112.899	764.168	1146.25	62.09
10	76	4	2	8	0	2.70435	83.4593	764.168	1146.25	63.2076
10	78	2	2	8	0	2.7	111.819	764.168	1146.25	64.8326
8	78	4	2	8	0	2.69397	80.153	764.168	1146.25	65.9644
8	80	2	2	8	0	2.68966	109.593	764.168	1146.25	67.5823
6	80	4	2	8	0	2.68376	80.153	764.168	1146.25	68.727
6	82	2	2	8	0	2.67949	109.593	764.168	1146.25	70.3382
4	82	4	2	8	0	2.67373	80.153	764.168	1146.25	71.4947
4	84	2	2	8	0	2.66949	108.879	764.168	1146.25	73.0997
2	84	4	2	8	0	2.66387	79.3998	764.168	1146.25	74.2671
2	86	2	2	8	0	2.65966	108.616	764.168	1146.25	75.8661
0	86	4	2	8	0	2.65417	79.1763	764.168	1146.25	77.0435
0	88	2	2	8	0	2.65	108.717	764.168	1146.25	78.637
46	38	6	4	0	6	2.93299	74.5369	764.078	1146.12	24.0432
70	16	4	4	0	6	3.12941	61.5187	764.04	1146.06	9.27526
72	16	2	10	0	0	3.14286	68.626	764.03	1146.05	15.4277
72	18	0	0	10	0	3.1369	61.1149	764.028	1146.04	6.16607
50	34	6	4	0	6	2.96316	74.4178	763.91	1145.87	21.0264
60	28	2	4	2	4	3.03333	69.1281	763.888	1145.83	12.7282
32	54	4	0	8	2	2.83173	57.1798	763.886	1145.83	33.6801
32	56	2	0	8	2	2.82692	86.6196	763.886	1145.83	35.4173
30	56	4	0	8	2	2.81905	58.2631	763.886	1145.83	36.2548
30	58	2	0	8	2	2.81429	87.7029	763.886	1145.83	37.9796
28	58	4	0	8	2	2.8066	58.2631	763.886	1145.83	38.8648
28	60	2	0	8	2	2.80189	87.7029	763.886	1145.83	40.5773
26	60	4	0	8	2	2.79439	57.4271	763.886	1145.83	41.5035
26	62	2	0	8	2	2.78972	86.8669	763.886	1145.83	43.204
24	62	4	0	8	2	2.78241	58.56	763.886	1145.83	44.1657
24	64	2	0	8	2	2.77778	87.9998	763.886	1145.83	45.8548
22	64	4	0	8	2	2.77064	57.9855	763.886	1145.83	46.8475
22	66	2	0	8	2	2.76606	87.4253	763.886	1145.83	48.5256
20	66	4	0	8	2	2.75909	57.9855	763.886	1145.83	49.5456
20	68	2	0	8	2	2.75455	87.4566	763.886	1145.83	51.2135
18	68	4	0	8	2	2.74775	58.0168	763.886	1145.83	52.2575
18	70	2	0	8	2	2.74324	87.4566	763.886	1145.83	53.9157
16	70	4	0	8	2	2.73661	58.0168	763.886	1145.83	54.9812
16	72	2	0	8	2	2.73214	89.0898	763.886	1145.83	56.6303
14	72	4	0	8	2	2.72566	60.8424	763.886	1145.83	57.715
14	74	2	0	8	2	2.72124	90.2821	763.886	1145.83	59.3555
12	74	4	0	8	2	2.71491	60.8424	763.886	1145.83	60.4575
12	76	2	0	8	2	2.71053	90.2821	763.886	1145.83	62.09
10	76	4	0	8	2	2.70435	60.8424	763.886	1145.83	63.2076
10	78	2	0	8	2	2.7	89.2022	763.886	1145.83	64.8326
8	78	4	0	8	2	2.69397	58.0828	763.886	1145.83	65.9644
8	80	2	0	8	2	2.68966	87.5226	763.886	1145.83	67.5823
6	80	4	0	8	2	2.68376	58.0828	763.886	1145.83	68.727
6	82	2	0	8	2	2.67949	87.5226	763.886	1145.83	70.3382
4	82	4	0	8	2	2.67373	58.0828	763.886	1145.83	71.4947
4	84	2	0	8	2	2.66949	86.8092	763.886	1145.83	73.0997
2	84	4	0	8	2	2.66387	57.3296	763.886	1145.83	74.2671
2	86	2	0	8	2	2.65966	86.5458	763.886	1145.83	75.8661
0	86	4	0	8	2	2.65417	57.1061	763.886	1145.83	77.0435
0	88	2	0	8	2	2.65	86.647	763.886	1145.83	78.637
46	38	6	6	2	2	2.93299	73.2395	763.702	1145.55	22.1377
70	20	0	0	10	0	3.11765	57.689	763.598	1145.4	6.16751
34	54	2	0	10	0	2.83981	84.5478	763.565	1145.35	32.161
40	50	0	8	2	0	2.875	102.106	763.547	1145.32	31.721
50	34	6	6	2	2	2.96316	72.8454	763.534	1145.3	19.5476
60	28	2	6	4	0	3.03333	70.977	763.491	1145.24	11.2253
60	28	2	4	4	2	3.03333	66.7842	763.47	1145.2	10.4885
46	38	6	10	0	0	2.93299	74.5718	763.399	1145.1	25.0215
46	38	6	0	0	10	2.93299	48.3578	763.395	1145.09	25.0215
64	22	4	4	6	0	3.07386	72.2554	763.354	1145.03	9.05607
32	58	0	4	6	0	2.82212	114.511	763.285	1144.93	38.137
30	60	0	4	6	0	2.80952	115.114	763.285	1144.93	40.6263
28	62	0	4	6	0	2.79717	114.278	763.285	1144.93	43.1574
26	64	0	4	6	0	2.78505	115.411	763.285	1144.93	45.7235
24	66	0	4	6	0	2.77315	115.411	763.285	1144.93	48.3189
22	68	0	4	6	0	2.76147	114.837	763.285	1144.93	50.9391
20	70	0	4	6	0	2.75	114.868	763.285	1144.93	53.5805
18	72	0	4	6	0	2.73874	114.868	763.285	1144.93	56.2402
16	74	0	4	6	0	2.72768	116.501	763.285	1144.93	58.9156
14	76	0	4	6	0	2.71681	117.693	763.285	1144.93	61.6047
12	78	0	4	6	0	2.70614	117.693	763.285	1144.93	64.3058
10	80	0	4	6	0	2.69565	116.613	763.285	1144.93	67.0174
8	82	0	4	6	0	2.68534	114.387	763.285	1144.93	69.7383
6	84	0	4	6	0	2.67521	114.387	763.285	1144.93	72.4675
4	86	0	4	6	0	2.66525	113.674	763.285	1144.93	75.204
2	88	0	4	6	0	2.65546	113.41	763.285	1144.93	77.947
0	90	0	4	6	0	2.64583	117.753	763.285	1144.93	80.696
60	30	0	0	6	4	3.02778	52.5123	763.254	1144.88	9.05592
50	34	6	0	0	10	2.96316	53.0118	763.227	1144.84	21.9601
62	24	4	4	6	0	3.05618	71.8825	763.179	1144.77	9.27465
60	26	4	4	6	0	3.03889	73.1402	763.179	1144.77	9.05604
38	52	0	8	2	0	2.86139	113.564	763.145	1144.72	33.7382
46	38	6	2	0	8	2.93299	63.1417	763.107	1144.66	24.3737
72	18	0	2	8	0	3.1369	64.9592	763.049	1144.57	7.61711
52	32	6	6	0	4	2.97872	76.1672	763.015	1144.52	19.3106
50	34	6	2	0	8	2.96316	63.0225	762.939	1144.41	21.4035
56	30	4	4	6	0	3.00543	74.9779	762.934	1144.4	11.0466
48	36	6	4	0	6	2.94792	76.401	762.931	1144.4	22.938
64	22	4	0	2	8	3.07386	52.9975	762.894	1144.34	8.60369
62	24	4	0	2	8	3.05618	52.6247	762.719	1144.08	9.69689
70	20	0	2	8	0	3.11765	63.248	762.619	1143.93	7.61828
64	22	4	2	2	6	3.07386	66.0824	762.606	1143.91	10.4892
48	36	6	6	2	2	2.94792	74.8286	762.554	1143.83	21.1204
70	20	0	4	0	6	3.11765	60.0809	762.471	1143.71	9.79872
62	24	4	2	2	6	3.05618	65.7095	762.431	1143.65	11.4031
38	50	2	2	8	0	2.86634	109.2	762.34	1143.51	28.0398
36	50	4	2	8	0	2.85784	79.0276	762.34	1143.51	28.6748
36	52	2	2	8	0	2.85294	108.467	762.34	1143.51	30.4348
34	52	4	2	8	0	2.84466	79.0276	762.34	1143.51	31.1495
58	30	2	2	6	2	3.01648	70.4685	762.252	1143.38	9.27447
48	36	6	10	0	0	2.94792	76.1609	762.251	1143.38	22.9419
48	36	6	0	0	10	2.94792	54.995	762.248	1143.37	23.9615
64	22	4	4	2	4	3.07386	68.9243	762.153	1143.23	12.7288
38	50	2	0	8	2	2.86634	86.5831	762.058	1143.09	28.0398
36	50	4	0	8	2	2.85784	56.4106	762.058	1143.09	28.6748
36	52	2	0	8	2	2.85294	85.8504	762.058	1143.09	30.4348
34	52	4	0	8	2	2.84466	56.4106	762.058	1143.09	31.1495
72	18	0	8	2	0	3.1369	72.1231	761.992	1142.99	14.6143
62	24	4	4	2	4	3.05618	68.5515	761.978	1142.97	13.1916
48	36	6	2	0	8	2.94792	65.0057	761.959	1142.94	23.2842
44	46	0	8	2	0	2.90306	90.496	761.939	1142.91	28.1096
42	48	0	8	2	0	2.88889	103.465	761.939	1142.91	29.8359
36	54	0	8	2	0	2.84804	112.474	761.923	1142.89	35.8652
34	56	0	8	2	0	2.83495	115.019	761.923	1142.89	38.0837
40	50	0	4	6	0	2.875	102.536	761.86	1142.79	28.8136
46	38	6	6	0	4	2.93299	75.6406	761.782	1142.67	24.0432
70	16	4	6	0	4	3.12941	61.1324	761.745	1142.62	11.4031
50	34	6	6	0	4	2.96316	75.5214	761.614	1142.42	21.0264
70	18	2	10	0	0	3.12353	67.4556	761.53	1142.29	16.3106
38	52	0	4	6	0	2.86139	113.994	761.457	1142.19	31.0204
58	28	4	0	2	8	3.02198	53.6153	761.422	1142.13	13.4935
60	30	0	0	4	6	3.02778	50.5741	761.388	1142.08	11.5763
42	46	2	2	8	0	2.89394	98.0263	761.134	1141.7	23.5405
40	46	4	2	8	0	2.885	68.3017	761.134	1141.7	23.9617
40	48	2	2	8	0	2.88	97.7415	761.134	1141.7	25.733
38	48	4	2	8	0	2.87129	79.7603	761.134	1141.7	26.2717
58	28	4	2	2	6	3.02198	72.3228	761.134	1141.7	13.7846
34	54	2	2	8	0	2.83981	108.467	761.119	1141.68	32.8988
66	22	2	6	4	0	3.08621	70.6775	760.953	1141.43	11.0458
64	24	2	6	4	0	3.06818	71.4906	760.953	1141.43	11.2253
66	22	2	4	4	2	3.08621	65.9166	760.932	1141.4	10.2961
64	24	2	4	4	2	3.06818	66.7297	760.932	1141.4	10.4885
40	46	4	0	8	2	2.885	45.6848	760.852	1141.28	23.9617
42	46	2	0	8	2	2.89394	75.4093	760.852	1141.28	23.5405
40	48	2	0	8	2	2.88	75.1245	760.852	1141.28	25.733
38	48	4	0	8	2	2.87129	57.1433	760.852	1141.28	26.2717
52	32	6	8	0	2	2.97872	75.4638	760.84	1141.26	18.8568
34	54	2	0	8	2	2.83981	85.8504	760.837	1141.26	32.8988
62	26	2	6	4	0	3.05056	71.2836	760.778	1141.17	11.0458
70	16	4	0	0	10	3.12941	52.1902	760.766	1141.15	5.65857
62	26	2	4	4	2	3.05056	66.5228	760.757	1141.13	10.2961
58	28	4	4	2	4	3.02198	75.1648	760.681	1141.02	13.4913
48	36	6	6	0	4	2.94792	77.5046	760.635	1140.95	22.938
74	16	0	0	10	0	3.15663	63.0985	760.506	1140.76	4.24368
70	16	4	2	0	8	3.12941	56.7084	760.478	1140.72	7.48461
58	28	4	6	4	0	3.02198	71.884	760.284	1140.43	12.0837
58	28	4	4	4	2	3.02198	72.8209	760.263	1140.39	11.4024
44	46	0	4	6	0	2.90306	89.8512	760.252	1140.38	24.7821
42	48	0	4	6	0	2.88889	102.821	760.252	1140.38	26.7242
36	54	0	4	6	0	2.84804	113.262	760.236	1140.35	33.3214
34	56	0	4	6	0	2.83495	113.262	760.236	1140.35	35.6983
70	20	0	0	0	10	3.11765	50.63	760.224	1140.34	5.65817
70	20	0	6	0	4	3.11765	62.9042	760.175	1140.26	12.085
70	20	0	2	0	8	3.11765	54.1503	759.936	1139.9	7.48431
56	26	8	0	10	0	3.0163	63.1825	759.849	1139.77	9.90129
58	30	2	8	2	0	3.01648	72.278	759.737	1139.61	14.6293
46	38	6	8	0	2	2.93299	74.948	759.607	1139.41	24.3737
74	16	0	2	8	0	3.15663	66.5936	759.528	1139.29	6.12659
50	34	6	8	0	2	2.96316	74.5539	759.44	1139.16	20.8233
56	26	8	0	8	2	3.0163	63.547	758.956	1138.43	10.8644
52	32	6	2	6	2	2.97872	74.9199	758.901	1138.35	14.4939
72	18	0	6	2	2	3.1369	62.2143	758.887	1138.33	12.0838
60	26	4	0	2	8	3.03889	53.8823	758.709	1138.06	11.4038
46	44	0	6	4	0	2.91753	89.132	758.7	1138.05	24.7007
46	44	0	4	4	2	2.91753	89.9127	758.678	1138.02	24.3747
56	26	8	2	8	0	3.0163	68.5482	758.522	1137.78	10.8644
72	16	2	8	0	2	3.14286	63.0608	758.487	1137.73	12.7284
56	30	4	0	2	8	3.00543	53.5847	758.464	1137.7	15.5573
48	36	6	8	0	2	2.94792	76.537	758.46	1137.69	22.9707
60	26	4	2	2	6	3.03889	66.9672	758.42	1137.63	12.8859
60	30	0	2	4	4	3.02778	62.0263	758.229	1137.34	10.8632
56	30	4	2	2	6	3.00543	73.7296	758.175	1137.26	14.7658
58	30	2	4	6	0	3.01648	72.0738	758.05	1137.07	9.69617
74	16	0	8	2	0	3.15663	72.9248	757.973	1136.96	13.6952
60	26	4	4	2	4	3.03889	69.8091	757.968	1136.95	13.0389
64	22	4	6	4	0	3.07386	71.1851	757.746	1136.62	11.5764
64	22	4	4	4	2	3.07386	66.5805	757.725	1136.59	10.8633
56	30	4	4	2	4	3.00543	76.5715	757.723	1136.58	14.4924
32	58	0	6	4	0	2.82212	113.029	757.677	1136.52	39.1718
30	60	0	6	4	0	2.80952	113.632	757.677	1136.52	41.5992
28	62	0	6	4	0	2.79717	112.796	757.677	1136.52	44.0745
26	64	0	6	4	0	2.78505	113.929	757.677	1136.52	46.5901
24	66	0	6	4	0	2.77315	113.929	757.677	1136.52	49.1397
22	68	0	6	4	0	2.76147	113.354	757.677	1136.52	51.7184
20	70	0	6	4	0	2.75	113.386	757.677	1136.52	54.322
18	72	0	6	4	0	2.73874	113.386	757.677	1136.52	56.947
16	74	0	6	4	0	2.72768	115.019	757.677	1136.52	59.5907
14	76	0	6	4	0	2.71681	116.211	757.677	1136.52	62.2506
12	78	0	6	4	0	2.70614	116.211	757.677	1136.52	64.9249
10	80	0	6	4	0	2.69565	115.131	757.677	1136.52	67.6116
8	82	0	6	4	0	2.68534	112.905	757.677	1136.52	70.3096
6	84	0	6	4	0	2.67521	112.905	757.677	1136.52	73.0174
4	86	0	6	4	0	2.66525	112.192	757.677	1136.52	75.734
2	88	0	6	4	0	2.65546	111.928	757.677	1136.52	78.4585
0	90	0	6	4	0	2.64583	116.271	757.677	1136.52	81.1902
46	38	6	2	6	2	2.93299	72.7713	757.668	1136.5	18.168
32	58	0	4	4	2	2.82212	113.81	757.656	1136.48	38.967
30	60	0	4	4	2	2.80952	114.413	757.656	1136.48	41.4064
28	62	0	4	4	2	2.79717	113.577	757.656	1136.48	43.8926
26	64	0	4	4	2	2.78505	114.71	757.656	1136.48	46.418
24	66	0	4	4	2	2.77315	114.71	757.656	1136.48	48.9766
22	68	0	4	4	2	2.76147	114.135	757.656	1136.48	51.5635
20	70	0	4	4	2	2.75	114.166	757.656	1136.48	54.1745
18	72	0	4	4	2	2.73874	114.166	757.656	1136.48	56.8064
16	74	0	4	4	2	2.72768	115.8	757.656	1136.48	59.4563
14	76	0	4	4	2	2.71681	116.992	757.656	1136.48	62.122
12	78	0	4	4	2	2.70614	116.992	757.656	1136.48	64.8015
10	80	0	4	4	2	2.69565	115.912	757.656	1136.48	67.4932
8	82	0	4	4	2	2.68534	113.686	757.656	1136.48	70.1957
6	84	0	4	4	2	2.67521	113.686	757.656	1136.48	72.9077
4	86	0	4	4	2	2.66525	112.972	757.656	1136.48	75.6283
2	88	0	4	4	2	2.65546	112.709	757.656	1136.48	78.3565
0	90	0	4	4	2	2.64583	117.052	757.656	1136.48	81.0916
62	24	4	6	4	0	3.05618	70.8122	757.571	1136.36	11.7482
60	26	4	6	4	0	3.03889	71.5018	757.571	1136.36	11.5763
62	24	4	4	4	2	3.05618	66.2076	757.55	1136.32	11.0462
60	26	4	4	4	2	3.03889	67.4653	757.55	1136.32	10.8633
50	32	8	10	0	0	2.96842	71.4266	757.531	1136.3	18.5726
48	34	8	10	0	0	2.95312	73.7919	757.531	1136.3	20.76
50	34	6	2	6	2	2.96316	73.1532	757.501	1136.25	16.0646
46	36	8	4	0	6	2.93814	75.365	757.399	1136.1	23.3682
60	28	2	0	6	4	3.03333	57.7702	757.381	1136.07	8.60278
56	30	4	6	4	0	3.00543	73.3395	757.326	1135.99	13.192
56	30	4	4	4	2	3.00543	74.2764	757.305	1135.96	12.5709
58	26	6	0	10	0	3.02747	52.0504	757.247	1135.87	7.34986
50	32	8	4	0	6	2.96842	72.784	757.231	1135.85	19.9223
48	34	8	4	0	6	2.95312	75.1493	757.231	1135.85	21.9758
46	36	8	6	2	2	2.93814	73.0715	757.022	1135.53	21.4026
46	40	4	4	0	6	2.92784	86.0521	756.953	1135.43	25.0218
46	42	2	4	0	6	2.92268	86.7526	756.953	1135.43	26.2698
44	42	4	4	0	6	2.91327	86.3402	756.953	1135.43	26.3459
44	44	2	4	0	6	2.90816	87.0407	756.953	1135.43	27.679
42	44	4	4	0	6	2.89899	81.6542	756.953	1135.43	27.895
56	28	6	0	10	0	3.01087	61.7561	756.908	1135.36	8.60401
50	32	8	6	2	2	2.96842	70.2156	756.855	1135.28	17.9516
48	34	8	6	2	2	2.95312	72.5809	756.855	1135.28	20.2064
72	16	2	4	0	6	3.14286	64.1667	756.813	1135.22	7.61661
46	36	8	10	0	0	2.93814	74.2825	756.719	1135.08	23.0872
46	36	8	0	0	10	2.93814	53.4942	756.715	1135.07	24.3736
46	40	4	6	2	2	2.92784	84.7547	756.577	1134.87	23.1967
46	42	2	6	2	2	2.92268	84.7547	756.577	1134.87	24.5378
44	42	4	6	2	2	2.91327	85.0428	756.577	1134.87	24.6192
44	44	2	6	2	2	2.90816	85.0428	756.577	1134.87	26.0409
42	44	4	6	2	2	2.89899	80.3568	756.577	1134.87	26.2704
50	32	8	0	0	10	2.96842	55.6864	756.548	1134.82	21.4063
48	34	8	0	0	10	2.95312	58.0517	756.548	1134.82	23.6235
48	36	6	2	6	2	2.94792	74.3604	756.521	1134.78	16.9136
46	36	8	2	0	8	2.93814	63.9697	756.427	1134.64	23.708
70	20	0	0	8	2	3.11765	54.0181	756.398	1134.6	7.61828
52	32	6	8	2	0	2.97872	76.1197	756.387	1134.58	17.9515
58	26	6	0	8	2	3.02747	47.4414	756.353	1134.53	8.60351
46	40	4	10	0	0	2.92784	86.087	756.274	1134.41	25.9632
46	42	2	10	0	0	2.92268	85.6867	756.274	1134.41	27.1681
44	42	4	10	0	0	2.91327	86.3751	756.274	1134.41	27.2416
44	44	2	10	0	0	2.90816	85.9748	756.274	1134.41	28.5329
42	44	4	10	0	0	2.89899	81.6891	756.274	1134.41	28.7425
46	40	4	0	0	10	2.92784	52.7761	756.27	1134.4	25.9632
46	42	2	0	0	10	2.92268	53.4766	756.27	1134.4	27.1681
44	42	4	0	0	10	2.91327	53.0642	756.27	1134.4	27.2416
44	44	2	0	0	10	2.90816	53.7647	756.27	1134.4	28.5329
42	44	4	0	0	10	2.89899	48.3782	756.27	1134.4	28.7425
50	32	8	2	0	8	2.96842	61.3888	756.259	1134.39	21.1239
48	34	8	2	0	8	2.95312	63.7541	756.259	1134.39	22.9362
40	50	0	6	4	0	2.875	101.054	756.252	1134.38	30.1699
40	50	0	4	4	2	2.875	101.834	756.231	1134.35	29.9035
56	28	6	0	8	2	3.01087	62.1206	756.015	1134.02	9.69686
46	40	4	2	0	8	2.92784	74.6568	755.981	1133.97	25.3395
46	42	2	2	0	8	2.92268	75.3573	755.981	1133.97	26.5726
44	42	4	2	0	8	2.91327	74.9449	755.981	1133.97	26.6478
44	44	2	2	0	8	2.90816	75.6454	755.981	1133.97	27.9665
42	44	4	2	0	8	2.89899	70.2589	755.981	1133.97	28.1803
32	54	4	4	0	6	2.83173	82.6071	755.931	1133.9	37.9256
32	56	2	4	0	6	2.82692	112.047	755.931	1133.9	39.4764
30	56	4	4	0	6	2.81905	83.6903	755.931	1133.9	40.2294
30	58	2	4	0	6	2.81429	113.13	755.931	1133.9	41.7905
28	58	4	4	0	6	2.8066	83.6903	755.931	1133.9	42.5966
28	60	2	4	0	6	2.80189	113.13	755.931	1133.9	44.1646
26	60	4	4	0	6	2.79439	82.8544	755.931	1133.9	45.0171
26	62	2	4	0	6	2.78972	112.294	755.931	1133.9	46.5895
24	62	4	4	0	6	2.78241	83.4879	755.931	1133.9	47.4827
24	64	2	4	0	6	2.77778	112.928	755.931	1133.9	49.0577
22	64	4	4	0	6	2.77064	82.9134	755.931	1133.9	49.9869
22	66	2	4	0	6	2.76606	112.353	755.931	1133.9	51.5629
20	66	4	4	0	6	2.75909	82.9134	755.931	1133.9	52.5239
20	68	2	4	0	6	2.75455	112.385	755.931	1133.9	54.1001
18	68	4	4	0	6	2.74775	82.9448	755.931	1133.9	55.0894
18	70	2	4	0	6	2.74324	112.385	755.931	1133.9	56.6648
16	70	4	4	0	6	2.73661	82.9448	755.931	1133.9	57.6796
16	72	2	4	0	6	2.73214	114.018	755.931	1133.9	59.2536
14	72	4	4	0	6	2.72566	85.7703	755.931	1133.9	60.2911
14	74	2	4	0	6	2.72124	115.21	755.931	1133.9	61.8634
12	74	4	4	0	6	2.71491	85.7703	755.931	1133.9	62.9215
12	76	2	4	0	6	2.71053	115.21	755.931	1133.9	64.4916
10	76	4	4	0	6	2.70435	85.7703	755.931	1133.9	65.5683
10	78	2	4	0	6	2.7	114.13	755.931	1133.9	67.1362
8	78	4	4	0	6	2.69397	82.464	755.931	1133.9	68.2298
8	80	2	4	0	6	2.68966	111.904	755.931	1133.9	69.7952
6	80	4	4	0	6	2.68376	82.464	755.931	1133.9	70.9042
6	82	2	4	0	6	2.67949	111.904	755.931	1133.9	72.467
4	82	4	4	0	6	2.67373	82.464	755.931	1133.9	73.5901
4	84	2	4	0	6	2.66949	111.19	755.931	1133.9	75.1503
2	84	4	4	0	6	2.66387	81.7108	755.931	1133.9	76.2863
2	86	2	4	0	6	2.65966	110.927	755.931	1133.9	77.8439
0	86	4	4	0	6	2.65417	81.4873	755.931	1133.9	78.9918
0	88	2	4	0	6	2.65	111.028	755.931	1133.9	80.5467
58	26	6	2	8	0	3.02747	63.7318	755.92	1133.88	8.60351
70	18	2	8	0	2	3.12353	61.8905	755.907	1133.86	13.7853
38	52	0	6	4	0	2.86139	112.512	755.849	1133.77	32.2841
38	52	0	4	4	2	2.86139	113.293	755.828	1133.74	32.0354
46	44	0	0	2	8	2.91753	52.6413	755.621	1133.43	26.573
56	28	6	2	8	0	3.01087	71.4302	755.581	1133.37	9.69686
32	54	4	6	2	2	2.83173	81.1327	755.554	1133.33	36.7471
32	56	2	6	2	2	2.82692	109.872	755.554	1133.33	38.3456
30	56	4	6	2	2	2.81905	82.216	755.554	1133.33	39.1204
30	58	2	6	2	2	2.81429	110.955	755.554	1133.33	40.7241
28	58	4	6	2	2	2.8066	82.216	755.554	1133.33	41.5508
28	60	2	6	2	2	2.80189	110.955	755.554	1133.33	43.1569
26	60	4	6	2	2	2.79439	81.38	755.554	1133.33	44.0288
26	62	2	6	2	2	2.78972	110.119	755.554	1133.33	45.6353
24	62	4	6	2	2	2.78241	82.0136	755.554	1133.33	46.5469
24	64	2	6	2	2	2.77778	110.753	755.554	1133.33	48.1525
22	64	4	6	2	2	2.77064	81.439	755.554	1133.33	49.0987
22	66	2	6	2	2	2.76606	110.178	755.554	1133.33	50.7024
20	66	4	6	2	2	2.75909	81.439	755.554	1133.33	51.6794
20	68	2	6	2	2	2.75455	110.21	755.554	1133.33	53.2806
18	68	4	6	2	2	2.74775	81.4704	755.554	1133.33	54.2849
18	70	2	6	2	2	2.74324	110.21	755.554	1133.33	55.8829
16	70	4	6	2	2	2.73661	81.4704	755.554	1133.33	56.9116
16	72	2	6	2	2	2.73214	111.843	755.554	1133.33	58.5063
14	72	4	6	2	2	2.72566	84.2959	755.554	1133.33	59.5569
14	74	2	6	2	2	2.72124	113.035	755.554	1133.33	61.148
12	74	4	6	2	2	2.71491	84.2959	755.554	1133.33	62.2183
12	76	2	6	2	2	2.71053	113.035	755.554	1133.33	63.8057
10	76	4	6	2	2	2.70435	84.2959	755.554	1133.33	64.8938
10	78	2	6	2	2	2.7	111.955	755.554	1133.33	66.4776
8	78	4	6	2	2	2.69397	80.9896	755.554	1133.33	67.5818
8	80	2	6	2	2	2.68966	109.729	755.554	1133.33	69.1619
6	80	4	6	2	2	2.68376	80.9896	755.554	1133.33	70.2809
6	82	2	6	2	2	2.67949	109.729	755.554	1133.33	71.8573
4	82	4	6	2	2	2.67373	80.9896	755.554	1133.33	72.9897
4	84	2	6	2	2	2.66949	109.016	755.554	1133.33	74.5625
2	84	4	6	2	2	2.66387	80.2364	755.554	1133.33	75.7073
2	86	2	6	2	2	2.65966	108.752	755.554	1133.33	77.2766
0	86	4	6	2	2	2.65417	80.0129	755.554	1133.33	78.4328
0	88	2	6	2	2	2.65	108.853	755.554	1133.33	79.9986
60	28	2	0	4	6	3.03333	55.8321	755.516	1133.27	11.2253
72	18	0	0	8	2	3.1369	57.444	755.467	1133.2	7.61711
46	44	0	2	2	6	2.91753	89.825	755.332	1133	26.1176
32	54	4	10	0	0	2.83173	82.642	755.251	1132.88	38.5532
32	56	2	10	0	0	2.82692	110.981	755.251	1132.88	40.0798
30	56	4	10	0	0	2.81905	83.7253	755.251	1132.88	40.8217
30	58	2	10	0	0	2.81429	112.064	755.251	1132.88	42.3609
28	58	4	10	0	0	2.8066	83.7253	755.251	1132.88	43.1564
28	60	2	10	0	0	2.80189	112.064	755.251	1132.88	44.7047
26	60	4	10	0	0	2.79439	82.8893	755.251	1132.88	45.5471
26	62	2	10	0	0	2.78972	111.228	755.251	1132.88	47.1019
24	62	4	10	0	0	2.78241	83.5229	755.251	1132.88	47.9855
24	64	2	10	0	0	2.77778	111.862	755.251	1132.88	49.5445
22	64	4	10	0	0	2.77064	82.9484	755.251	1132.88	50.4647
22	66	2	10	0	0	2.76606	111.287	755.251	1132.88	52.0263
20	66	4	10	0	0	2.75909	82.9484	755.251	1132.88	52.9789
20	68	2	10	0	0	2.75455	111.319	755.251	1132.88	54.5419
18	68	4	10	0	0	2.74775	82.9797	755.251	1132.88	55.5234
18	70	2	10	0	0	2.74324	111.319	755.251	1132.88	57.0868
16	70	4	10	0	0	2.73661	82.9797	755.251	1132.88	58.0942
16	72	2	10	0	0	2.73214	112.952	755.251	1132.88	59.6573
14	72	4	10	0	0	2.72566	85.8052	755.251	1132.88	60.6879
14	74	2	10	0	0	2.72124	114.144	755.251	1132.88	62.2501
12	74	4	10	0	0	2.71491	85.8052	755.251	1132.88	63.3018
12	76	2	10	0	0	2.71053	114.144	755.251	1132.88	64.8627
10	76	4	10	0	0	2.70435	85.8052	755.251	1132.88	65.9333
10	78	2	10	0	0	2.7	113.064	755.251	1132.88	67.4927
8	78	4	10	0	0	2.69397	82.4989	755.251	1132.88	68.5806
8	80	2	10	0	0	2.68966	110.838	755.251	1132.88	70.1382
6	80	4	10	0	0	2.68376	82.4989	755.251	1132.88	71.2418
6	82	2	10	0	0	2.67949	110.838	755.251	1132.88	72.7974
4	82	4	10	0	0	2.67373	82.4989	755.251	1132.88	73.9155
4	84	2	10	0	0	2.66949	110.125	755.251	1132.88	75.469
2	84	4	10	0	0	2.66387	81.7457	755.251	1132.88	76.6003
2	86	2	10	0	0	2.65966	109.861	755.251	1132.88	78.1516
0	86	4	10	0	0	2.65417	81.5222	755.251	1132.88	79.295
0	88	2	10	0	0	2.65	109.962	755.251	1132.88	80.8441
32	54	4	0	0	10	2.83173	56.961	755.247	1132.87	38.5532
32	56	2	0	0	10	2.82692	85.2805	755.247	1132.87	40.0798
30	56	4	0	0	10	2.81905	58.0443	755.247	1132.87	40.8217
30	58	2	0	0	10	2.81429	86.3638	755.247	1132.87	42.3609
28	58	4	0	0	10	2.8066	58.0443	755.247	1132.87	43.1564
28	60	2	0	0	10	2.80189	86.3638	755.247	1132.87	44.7047
26	60	4	0	0	10	2.79439	57.2084	755.247	1132.87	45.5471
26	62	2	0	0	10	2.78972	85.5278	755.247	1132.87	47.1019
24	62	4	0	0	10	2.78241	57.8419	755.247	1132.87	47.9855
24	64	2	0	0	10	2.77778	86.1614	755.247	1132.87	49.5445
22	64	4	0	0	10	2.77064	57.2674	755.247	1132.87	50.4647
22	66	2	0	0	10	2.76606	85.5869	755.247	1132.87	52.0263
20	66	4	0	0	10	2.75909	57.2674	755.247	1132.87	52.9789
20	68	2	0	0	10	2.75455	85.6182	755.247	1132.87	54.5419
18	68	4	0	0	10	2.74775	57.2987	755.247	1132.87	55.5234
18	70	2	0	0	10	2.74324	85.6182	755.247	1132.87	57.0868
16	70	4	0	0	10	2.73661	57.2987	755.247	1132.87	58.0942
16	72	2	0	0	10	2.73214	89.0243	755.247	1132.87	59.6573
14	72	4	0	0	10	2.72566	61.8972	755.247	1132.87	60.6879
14	74	2	0	0	10	2.72124	90.2166	755.247	1132.87	62.2501
12	74	4	0	0	10	2.71491	61.8972	755.247	1132.87	63.3018
12	76	2	0	0	10	2.71053	90.2166	755.247	1132.87	64.8627
10	76	4	0	0	10	2.70435	61.8972	755.247	1132.87	65.9333
10	78	2	0	0	10	2.7	89.1367	755.247	1132.87	67.4927
8	78	4	0	0	10	2.69397	59.1376	755.247	1132.87	68.5806
8	80	2	0	0	10	2.68966	87.4571	755.247	1132.87	70.1382
6	80	4	0	0	10	2.68376	59.1376	755.247	1132.87	71.2418
6	82	2	0	0	10	2.67949	87.4571	755.247	1132.87	72.7974
4	82	4	0	0	10	2.67373	59.1376	755.247	1132.87	73.9155
4	84	2	0	0	10	2.66949	86.7437	755.247	1132.87	75.469
2	84	4	0	0	10	2.66387	58.3844	755.247	1132.87	76.6003
2	86	2	0	0	10	2.65966	86.4804	755.247	1132.87	78.1516
0	86	4	0	0	10	2.65417	58.1609	755.247	1132.87	79.295
0	88	2	0	0	10	2.65	86.5815	755.247	1132.87	80.8441
46	38	6	8	2	0	2.93299	75.6038	755.154	1132.73	22.6733
46	36	8	6	0	4	2.93814	75.4726	755.103	1132.65	23.3682
50	34	6	8	2	0	2.96316	75.2098	754.986	1132.48	20.0073
32	54	4	2	0	8	2.83173	78.8418	754.959	1132.44	38.1359
32	56	2	2	0	8	2.82692	107.161	754.959	1132.44	39.6785
30	56	4	2	0	8	2.81905	79.9251	754.959	1132.44	40.4278
30	58	2	2	0	8	2.81429	108.245	754.959	1132.44	41.9815
28	58	4	2	0	8	2.8066	79.9251	754.959	1132.44	42.784
28	60	2	2	0	8	2.80189	108.245	754.959	1132.44	44.3454
26	60	4	2	0	8	2.79439	79.0891	754.959	1132.44	45.1945
26	62	2	2	0	8	2.78972	107.409	754.959	1132.44	46.7609
24	62	4	2	0	8	2.78241	79.7227	754.959	1132.44	47.6509
24	64	2	2	0	8	2.77778	108.042	754.959	1132.44	49.2205
22	64	4	2	0	8	2.77064	79.1482	754.959	1132.44	50.1466
22	66	2	2	0	8	2.76606	107.468	754.959	1132.44	51.7179
20	66	4	2	0	8	2.75909	79.1482	754.959	1132.44	52.676
20	68	2	2	0	8	2.75455	107.499	754.959	1132.44	54.2477
18	68	4	2	0	8	2.74775	79.1795	754.959	1132.44	55.2345
18	70	2	2	0	8	2.74324	107.499	754.959	1132.44	56.8058
16	70	4	2	0	8	2.73661	79.1795	754.959	1132.44	57.8181
16	72	2	2	0	8	2.73214	110.905	754.959	1132.44	59.3885
14	72	4	2	0	8	2.72566	83.7779	754.959	1132.44	60.4237
14	74	2	2	0	8	2.72124	112.097	754.959	1132.44	61.9926
12	74	4	2	0	8	2.71491	83.7779	754.959	1132.44	63.0485
12	76	2	2	0	8	2.71053	112.097	754.959	1132.44	64.6156
10	76	4	2	0	8	2.70435	83.7779	754.959	1132.44	65.6902
10	78	2	2	0	8	2.7	111.017	754.959	1132.44	67.2552
8	78	4	2	0	8	2.69397	80.4716	754.959	1132.44	68.3469
8	80	2	2	0	8	2.68966	108.791	754.959	1132.44	69.9097
6	80	4	2	0	8	2.68376	80.4716	754.959	1132.44	71.0169
6	82	2	2	0	8	2.67949	108.791	754.959	1132.44	72.5773
4	82	4	2	0	8	2.67373	80.4716	754.959	1132.44	73.6987
4	84	2	2	0	8	2.66949	108.078	754.959	1132.44	75.2567
2	84	4	2	0	8	2.66387	79.7184	754.959	1132.44	76.3911
2	86	2	2	0	8	2.65966	107.814	754.959	1132.44	77.9466
0	86	4	2	0	8	2.65417	79.4949	754.959	1132.44	79.093
0	88	2	2	0	8	2.65	107.915	754.959	1132.44	80.646
50	32	8	6	0	4	2.96842	72.8916	754.935	1132.4	19.0678
48	34	8	6	0	4	2.95312	75.2569	754.935	1132.4	21.2042
46	44	0	4	2	4	2.91753	92.667	754.88	1132.32	25.9639
74	16	0	6	2	2	3.15663	64.2835	754.868	1132.3	11.2251
66	22	2	0	6	4	3.08621	54.8953	754.843	1132.26	8.36722
64	24	2	0	6	4	3.06818	55.7084	754.843	1132.26	8.60281
52	32	6	4	6	0	2.97872	76.5252	754.699	1132.05	14.7673
62	26	2	0	6	4	3.05056	55.5015	754.668	1132	8.36721
46	40	4	6	0	4	2.92784	87.1557	754.657	1131.99	25.0218
46	42	2	6	0	4	2.92268	87.1557	754.657	1131.99	26.2698
44	42	4	6	0	4	2.91327	87.4438	754.657	1131.99	26.3459
44	44	2	6	0	4	2.90816	87.4438	754.657	1131.99	27.679
42	44	4	6	0	4	2.89899	82.7578	754.657	1131.99	27.895
44	46	0	6	4	0	2.90306	88.369	754.644	1131.97	26.3468
42	48	0	6	4	0	2.88889	101.338	754.644	1131.97	28.1813
36	54	0	6	4	0	2.84804	111.779	754.628	1131.94	34.5009
34	56	0	6	4	0	2.83495	111.779	754.628	1131.94	36.8018
44	46	0	4	4	2	2.90306	89.1498	754.622	1131.93	26.0413
42	48	0	4	4	2	2.88889	102.119	754.622	1131.93	27.8959
36	54	0	4	4	2	2.84804	112.56	754.607	1131.91	34.2683
34	56	0	4	4	2	2.83495	112.56	754.607	1131.91	36.5837
32	58	0	0	2	8	2.82212	85.638	754.598	1131.9	40.3786
30	60	0	0	2	8	2.80952	86.2408	754.598	1131.9	42.7375
28	62	0	0	2	8	2.79717	85.4049	754.598	1131.9	45.1504
26	64	0	0	2	8	2.78505	86.0384	754.598	1131.9	47.6092
24	66	0	0	2	8	2.77315	86.0384	754.598	1131.9	50.107
22	68	0	0	2	8	2.76147	85.4639	754.598	1131.9	52.6383
20	70	0	0	2	8	2.75	85.4953	754.598	1131.9	55.1985
18	72	0	0	2	8	2.73874	85.4953	754.598	1131.9	57.7837
16	74	0	0	2	8	2.72768	88.9013	754.598	1131.9	60.3908
14	76	0	0	2	8	2.71681	90.0937	754.598	1131.9	63.017
12	78	0	0	2	8	2.70614	90.0937	754.598	1131.9	65.66
10	80	0	0	2	8	2.69565	84.1353	754.598	1131.9	68.3179
8	82	0	0	2	8	2.68534	87.3341	754.598	1131.9	70.989
6	84	0	0	2	8	2.67521	87.3341	754.598	1131.9	73.6718
4	86	0	0	2	8	2.66525	86.6208	754.598	1131.9	76.3652
2	88	0	0	2	8	2.65546	86.3574	754.598	1131.9	79.068
0	90	0	0	2	8	2.64583	90.7985	754.598	1131.9	81.7793
72	16	2	6	0	4	3.14286	63.9366	754.517	1131.78	10.1001
32	58	0	2	2	6	2.82212	115.192	754.31	1131.46	40.0803
30	60	0	2	2	6	2.80952	115.795	754.31	1131.46	42.4558
28	62	0	2	2	6	2.79717	114.959	754.31	1131.46	44.8839
26	64	0	2	2	6	2.78505	115.592	754.31	1131.46	47.3565
24	66	0	2	2	6	2.77315	115.592	754.31	1131.46	49.8669
22	68	0	2	2	6	2.76147	115.018	754.31	1131.46	52.4098
20	70	0	2	2	6	2.75	115.049	754.31	1131.46	54.9807
18	72	0	2	2	6	2.73874	115.049	754.31	1131.46	57.5757
16	74	0	2	2	6	2.72768	116.682	754.31	1131.46	60.1918
14	76	0	2	2	6	2.71681	117.874	754.31	1131.46	62.8263
12	78	0	2	2	6	2.70614	117.874	754.31	1131.46	65.477
10	80	0	2	2	6	2.69565	116.795	754.31	1131.46	68.142
8	82	0	2	2	6	2.68534	114.568	754.31	1131.46	70.8197
6	84	0	2	2	6	2.67521	114.568	754.31	1131.46	73.5087
4	86	0	2	2	6	2.66525	113.855	754.31	1131.46	76.2079
2	88	0	2	2	6	2.65546	113.591	754.31	1131.46	78.916
0	90	0	2	2	6	2.64583	117.222	754.31	1131.46	81.6324
70	18	2	4	0	6	3.12353	62.3948	754.233	1131.35	9.27555
58	28	4	0	6	4	3.02198	63.8069	754.174	1131.26	9.69614
56	26	8	4	0	6	3.0163	69.2528	754.172	1131.26	15.3245
38	50	2	4	0	6	2.86634	109.289	754.103	1131.15	33.0186
36	50	4	4	0	6	2.85784	79.1162	754.103	1131.15	33.5596
36	52	2	4	0	6	2.85294	108.556	754.103	1131.15	35.0753
34	52	4	4	0	6	2.84466	81.8378	754.103	1131.15	35.6973
48	36	6	8	2	0	2.94792	77.1929	754.006	1131.01	21.6811
54	28	8	0	10	0	3	63.8057	753.946	1130.92	11.2272
32	58	0	4	2	4	2.82212	118.034	753.857	1130.79	39.9804
30	60	0	4	2	4	2.80952	118.637	753.857	1130.79	42.3615
28	62	0	4	2	4	2.79717	117.801	753.857	1130.79	44.7947
26	64	0	4	2	4	2.78505	118.434	753.857	1130.79	47.2719
24	66	0	4	2	4	2.77315	118.434	753.857	1130.79	49.7867
22	68	0	4	2	4	2.76147	117.86	753.857	1130.79	52.3335
20	70	0	4	2	4	2.75	117.891	753.857	1130.79	54.9079
18	72	0	4	2	4	2.73874	117.891	753.857	1130.79	57.5062
16	74	0	4	2	4	2.72768	119.524	753.857	1130.79	60.1253
14	76	0	4	2	4	2.71681	120.716	753.857	1130.79	62.7626
12	78	0	4	2	4	2.70614	120.716	753.857	1130.79	65.4159
10	80	0	4	2	4	2.69565	119.637	753.857	1130.79	68.0833
8	82	0	4	2	4	2.68534	117.41	753.857	1130.79	70.7632
6	84	0	4	2	4	2.67521	117.41	753.857	1130.79	73.4543
4	86	0	4	2	4	2.66525	116.697	753.857	1130.79	76.1553
2	88	0	4	2	4	2.65546	116.433	753.857	1130.79	78.8653
0	90	0	4	2	4	2.64583	120.064	753.857	1130.79	81.5834
38	50	2	6	2	2	2.86634	107.291	753.726	1130.59	31.658
36	50	4	6	2	2	2.85784	77.8188	753.726	1130.59	32.2218
36	52	2	6	2	2	2.85294	106.558	753.726	1130.59	33.7976
34	52	4	6	2	2	2.84466	80.3635	753.726	1130.59	34.4426
32	54	4	6	0	4	2.83173	83.7107	753.635	1130.45	37.9256
32	56	2	6	0	4	2.82692	112.45	753.635	1130.45	39.4764
30	56	4	6	0	4	2.81905	84.794	753.635	1130.45	40.2294
30	58	2	6	0	4	2.81429	113.533	753.635	1130.45	41.7905
28	58	4	6	0	4	2.8066	84.794	753.635	1130.45	42.5966
28	60	2	6	0	4	2.80189	113.533	753.635	1130.45	44.1646
26	60	4	6	0	4	2.79439	83.958	753.635	1130.45	45.0171
26	62	2	6	0	4	2.78972	112.697	753.635	1130.45	46.5895
24	62	4	6	0	4	2.78241	84.5916	753.635	1130.45	47.4827
24	64	2	6	0	4	2.77778	113.331	753.635	1130.45	49.0577
22	64	4	6	0	4	2.77064	84.0171	753.635	1130.45	49.9869
22	66	2	6	0	4	2.76606	112.756	753.635	1130.45	51.5629
20	66	4	6	0	4	2.75909	84.0171	753.635	1130.45	52.5239
20	68	2	6	0	4	2.75455	112.788	753.635	1130.45	54.1001
18	68	4	6	0	4	2.74775	84.0484	753.635	1130.45	55.0894
18	70	2	6	0	4	2.74324	112.788	753.635	1130.45	56.6648
16	70	4	6	0	4	2.73661	84.0484	753.635	1130.45	57.6796
16	72	2	6	0	4	2.73214	114.421	753.635	1130.45	59.2536
14	72	4	6	0	4	2.72566	86.8739	753.635	1130.45	60.2911
14	74	2	6	0	4	2.72124	115.613	753.635	1130.45	61.8634
12	74	4	6	0	4	2.71491	86.8739	753.635	1130.45	62.9215
12	76	2	6	0	4	2.71053	115.613	753.635	1130.45	64.4916
10	76	4	6	0	4	2.70435	86.8739	753.635	1130.45	65.5683
10	78	2	6	0	4	2.7	114.533	753.635	1130.45	67.1362
8	78	4	6	0	4	2.69397	83.5676	753.635	1130.45	68.2298
8	80	2	6	0	4	2.68966	112.307	753.635	1130.45	69.7952
6	80	4	6	0	4	2.68376	83.5676	753.635	1130.45	70.9042
6	82	2	6	0	4	2.67949	112.307	753.635	1130.45	72.467
4	82	4	6	0	4	2.67373	83.5676	753.635	1130.45	73.5901
4	84	2	6	0	4	2.66949	111.594	753.635	1130.45	75.1503
2	84	4	6	0	4	2.66387	82.8144	753.635	1130.45	76.2863
2	86	2	6	0	4	2.65966	111.33	753.635	1130.45	77.8439
0	86	4	6	0	4	2.65417	82.5909	753.635	1130.45	78.9918
0	88	2	6	0	4	2.65	111.431	753.635	1130.45	80.5467
58	30	2	0	2	8	3.01648	52.1667	753.58	1130.37	14.3557
74	16	0	4	6	0	3.15663	67.5328	753.564	1130.35	8.45833
72	16	2	0	0	10	3.14286	54.0432	753.539	1130.31	4.24413
56	26	8	0	0	10	3.0163	54.8639	753.489	1130.23	14.356
46	38	6	4	6	0	2.93299	74.3766	753.466	1130.2	18.3869
38	50	2	10	0	0	2.86634	108.223	753.423	1130.14	33.7377
36	50	4	10	0	0	2.85784	79.1511	753.423	1130.14	34.2673
36	52	2	10	0	0	2.85294	107.49	753.423	1130.14	35.753
34	52	4	10	0	0	2.84466	81.8727	753.423	1130.14	36.3634
38	50	2	0	0	10	2.86634	82.5224	753.42	1130.13	33.7377
36	50	4	0	0	10	2.85784	53.4702	753.42	1130.13	34.2673
36	52	2	0	0	10	2.85294	81.7897	753.42	1130.13	35.753
34	52	4	0	0	10	2.84466	56.1918	753.42	1130.13	36.3634
50	34	6	4	6	0	2.96316	74.7585	753.299	1129.95	16.3117
58	30	2	2	2	6	3.01648	70.8743	753.291	1129.94	13.7846
72	16	2	2	0	8	3.14286	58.9523	753.251	1129.88	5.47838
56	26	8	2	0	8	3.0163	59.1289	753.201	1129.8	15.3001
40	50	0	0	2	8	2.875	71.1179	753.173	1129.76	31.721
80	10	0	4	0	6	3.21875	53.6616	753.134	1129.7	5.65685
38	50	2	2	0	8	2.86634	104.403	753.131	1129.7	33.26
36	50	4	2	0	8	2.85784	75.3509	753.131	1129.7	33.7971
36	52	2	2	0	8	2.85294	103.67	753.131	1129.7	35.3027
34	52	4	2	0	8	2.84466	78.0726	753.131	1129.7	35.9207
66	22	2	0	4	6	3.08621	52.9572	752.977	1129.47	10.2967
64	24	2	0	4	6	3.06818	53.7703	752.977	1129.47	10.8638
46	36	8	8	0	2	2.93814	74.78	752.928	1129.39	23.1158
42	46	2	4	0	6	2.89394	99.19	752.897	1129.35	29.2943
40	46	4	4	0	6	2.885	68.3904	752.897	1129.35	29.6338
40	48	2	4	0	6	2.88	97.8302	752.897	1129.35	31.0836
38	48	4	4	0	6	2.87129	79.8489	752.897	1129.35	31.531
40	50	0	2	2	6	2.875	100.672	752.885	1129.33	31.3404
34	54	2	4	0	6	2.83981	111.278	752.881	1129.32	37.2334
70	20	0	8	2	0	3.11765	70.4013	752.879	1129.32	14.63
58	30	2	4	2	4	3.01648	73.7162	752.838	1129.26	13.4913
62	26	2	0	4	6	3.05056	53.5633	752.803	1129.2	11.0458
38	52	0	0	2	8	2.86139	82.5764	752.77	1129.16	33.7382
50	32	8	8	0	2	2.96842	71.9241	752.76	1129.14	18.6081
48	34	8	8	0	2	2.95312	74.2894	752.76	1129.14	20.7917
42	46	2	6	2	2	2.89394	97.1921	752.521	1128.78	27.7517
40	46	4	6	2	2	2.885	67.093	752.521	1128.78	28.1098
40	48	2	6	2	2	2.88	95.8323	752.521	1128.78	29.6343
38	48	4	6	2	2	2.87129	78.5515	752.521	1128.78	30.1032
34	54	2	6	2	2	2.83981	109.103	752.505	1128.76	36.0323
46	40	4	8	0	2	2.92784	86.4631	752.482	1128.72	25.3395
46	42	2	8	0	2	2.92268	85.4536	752.482	1128.72	26.5726
44	42	4	8	0	2	2.91327	86.7512	752.482	1128.72	26.6478
44	44	2	8	0	2	2.90816	85.7417	752.482	1128.72	27.9665
42	44	4	8	0	2	2.89899	82.0652	752.482	1128.72	28.1803
38	52	0	2	2	6	2.86139	112.13	752.482	1128.72	33.3806
58	30	2	6	4	0	3.01648	70.5917	752.442	1128.66	12.0837
40	50	0	4	2	4	2.875	103.514	752.432	1128.65	31.2125
58	30	2	4	4	2	3.01648	71.3724	752.421	1128.63	11.4024
60	28	2	2	4	4	3.03333	68.2466	752.357	1128.53	10.4885
48	36	6	4	6	0	2.94792	75.9657	752.319	1128.48	17.1485
58	28	4	0	4	6	3.02198	61.8688	752.309	1128.46	12.0837
42	46	2	10	0	0	2.89394	98.1242	752.218	1128.33	30.1024
40	46	4	10	0	0	2.885	68.4253	752.218	1128.33	30.4329
40	48	2	10	0	0	2.88	96.7643	752.218	1128.33	31.8463
38	48	4	10	0	0	2.87129	79.8839	752.218	1128.33	32.2831
42	46	2	0	0	10	2.89394	72.4237	752.214	1128.32	30.1024
40	48	2	0	0	10	2.88	71.0638	752.214	1128.32	31.8463
40	46	4	0	0	10	2.885	42.7444	752.214	1128.32	30.4329
38	48	4	0	0	10	2.87129	54.2029	752.214	1128.32	32.2831
34	54	2	10	0	0	2.83981	110.212	752.202	1128.3	37.8725
34	54	2	0	0	10	2.83981	84.5113	752.198	1128.3	37.8725
38	52	0	4	2	4	2.86139	114.972	752.029	1128.04	33.2606
70	18	2	0	0	10	3.12353	53.0662	752.006	1128.01	4.90038
74	16	0	0	8	2	3.15663	59.4276	751.946	1127.92	6.12659
70	18	2	6	0	4	3.12353	62.4952	751.937	1127.91	11.4033
42	46	2	2	0	8	2.89394	94.3045	751.926	1127.89	29.5661
40	46	4	2	0	8	2.885	64.6251	751.926	1127.89	29.9026
40	48	2	2	0	8	2.88	92.9446	751.926	1127.89	31.3399
38	48	4	2	0	8	2.87129	76.0837	751.926	1127.89	31.7837
34	54	2	2	0	8	2.83981	106.392	751.91	1127.86	37.4477
80	10	0	6	0	4	3.21875	58.1963	751.894	1127.84	8.48528
56	26	8	6	0	4	3.0163	69.3604	751.876	1127.81	14.1958
38	50	2	6	0	4	2.86634	109.692	751.807	1127.71	33.0186
36	50	4	6	0	4	2.85784	80.2199	751.807	1127.71	33.5596
36	52	2	6	0	4	2.85294	108.959	751.807	1127.71	35.0753
34	52	4	6	0	4	2.84466	82.9415	751.807	1127.71	35.6973
70	18	2	2	0	8	3.12353	57.5844	751.718	1127.58	6.92919
64	22	4	0	6	4	3.07386	55.5592	751.636	1127.45	9.05607
58	26	6	4	0	6	3.02747	59.5116	751.57	1127.35	14.7671
44	46	0	0	2	8	2.90306	51.8784	751.565	1127.35	28.1096
42	48	0	0	2	8	2.88889	72.4778	751.565	1127.35	29.8359
36	54	0	0	2	8	2.84804	81.8437	751.549	1127.32	35.8652
34	56	0	0	2	8	2.83495	84.3883	751.549	1127.32	38.0837
62	24	4	0	6	4	3.05618	55.1863	751.461	1127.19	9.27465
60	26	4	0	6	4	3.03889	56.4439	751.461	1127.19	9.05604
32	54	4	8	0	2	2.83173	83.0181	751.46	1127.19	38.1359
32	56	2	8	0	2	2.82692	110.748	751.46	1127.19	39.6785
30	56	4	8	0	2	2.81905	84.1014	751.46	1127.19	40.4278
30	58	2	8	0	2	2.81429	111.831	751.46	1127.19	41.9815
28	58	4	8	0	2	2.8066	84.1014	751.46	1127.19	42.784
28	60	2	8	0	2	2.80189	111.831	751.46	1127.19	44.3454
26	60	4	8	0	2	2.79439	83.2654	751.46	1127.19	45.1945
26	62	2	8	0	2	2.78972	110.995	751.46	1127.19	46.7609
24	62	4	8	0	2	2.78241	83.899	751.46	1127.19	47.6509
24	64	2	8	0	2	2.77778	111.629	751.46	1127.19	49.2205
22	64	4	8	0	2	2.77064	83.3245	751.46	1127.19	50.1466
22	66	2	8	0	2	2.76606	111.054	751.46	1127.19	51.7179
20	66	4	8	0	2	2.75909	83.3245	751.46	1127.19	52.676
20	68	2	8	0	2	2.75455	111.085	751.46	1127.19	54.2477
18	68	4	8	0	2	2.74775	83.3558	751.46	1127.19	55.2345
18	70	2	8	0	2	2.74324	111.085	751.46	1127.19	56.8058
16	70	4	8	0	2	2.73661	83.3558	751.46	1127.19	57.8181
16	72	2	8	0	2	2.73214	112.719	751.46	1127.19	59.3885
14	72	4	8	0	2	2.72566	86.1813	751.46	1127.19	60.4237
14	74	2	8	0	2	2.72124	113.911	751.46	1127.19	61.9926
12	74	4	8	0	2	2.71491	86.1813	751.46	1127.19	63.0485
12	76	2	8	0	2	2.71053	113.911	751.46	1127.19	64.6156
10	76	4	8	0	2	2.70435	86.1813	751.46	1127.19	65.6902
10	78	2	8	0	2	2.7	112.831	751.46	1127.19	67.2552
8	78	4	8	0	2	2.69397	82.875	751.46	1127.19	68.3469
8	80	2	8	0	2	2.68966	110.605	751.46	1127.19	69.9097
6	80	4	8	0	2	2.68376	82.875	751.46	1127.19	71.0169
6	82	2	8	0	2	2.67949	110.605	751.46	1127.19	72.5773
4	82	4	8	0	2	2.67373	82.875	751.46	1127.19	73.6987
4	84	2	8	0	2	2.66949	109.891	751.46	1127.19	75.2567
2	84	4	8	0	2	2.66387	82.1218	751.46	1127.19	76.3911
2	86	2	8	0	2	2.65966	109.628	751.46	1127.19	77.9466
0	86	4	8	0	2	2.65417	81.8983	751.46	1127.19	79.093
0	88	2	8	0	2	2.65	109.729	751.46	1127.19	80.646
56	26	8	10	0	0	3.0163	66.65	751.301	1126.95	13.5233
44	46	0	2	2	6	2.90306	89.0621	751.276	1126.91	27.6794
42	48	0	2	2	6	2.88889	102.031	751.276	1126.91	29.431
36	54	0	2	2	6	2.84804	111.397	751.261	1126.89	35.5291
34	56	0	2	2	6	2.83495	113.942	751.261	1126.89	37.7673
56	28	6	4	0	6	3.01087	72.1348	751.231	1126.85	16.6763
56	30	4	0	6	4	3.00543	63.8251	751.216	1126.82	11.0466
46	36	8	2	6	2	2.93814	73.5994	750.989	1126.48	17.2647
78	12	0	2	8	0	3.19753	56.0807	750.936	1126.4	5.79133
58	26	6	0	0	10	3.02747	46.4371	750.887	1126.33	12.0858
44	46	0	4	2	4	2.90306	91.904	750.824	1126.24	27.5345
42	48	0	4	2	4	2.88889	104.873	750.824	1126.24	29.2948
50	32	8	2	6	2	2.96842	71.5194	750.821	1126.23	15.5587
48	34	8	2	6	2	2.95312	73.1088	750.821	1126.23	16.1885
36	54	0	4	2	4	2.84804	114.239	750.808	1126.21	35.4163
34	56	0	4	2	4	2.83495	116.784	750.808	1126.21	37.6612
56	26	8	6	2	2	3.0163	66.9486	750.624	1125.94	12.657
78	12	0	0	10	0	3.19753	51.5859	750.607	1125.91	3.94097
42	46	2	6	0	4	2.89394	99.5932	750.601	1125.9	29.2943
40	46	4	6	0	4	2.885	69.494	750.601	1125.9	29.6338
40	48	2	6	0	4	2.88	98.2333	750.601	1125.9	31.0836
38	48	4	6	0	4	2.87129	80.9526	750.601	1125.9	31.531
58	26	6	2	0	8	3.02747	57.0178	750.598	1125.9	13.1935
34	54	2	6	0	4	2.83981	111.681	750.586	1125.88	37.2334
56	28	6	0	0	10	3.01087	53.4375	750.548	1125.82	14.3562
46	40	4	2	6	2	2.92784	84.2865	750.543	1125.81	19.4445
46	42	2	2	6	2	2.92268	84.987	750.543	1125.81	21.0263
44	42	4	2	6	2	2.91327	84.5746	750.543	1125.81	21.1212
44	44	2	2	6	2	2.90816	85.2751	750.543	1125.81	22.7624
42	44	4	2	6	2	2.89899	79.8886	750.543	1125.81	23.0246
78	12	0	8	2	0	3.19753	62.3942	750.283	1125.42	12.2798
56	28	6	2	0	8	3.01087	62.0109	750.26	1125.39	15.3003
46	34	10	0	10	0	2.9433	63.1196	750.177	1125.27	13.3443
44	36	10	0	10	0	2.92857	63.9417	750.177	1125.27	14.9023
48	32	10	0	10	0	2.95833	66.5664	750.01	1125.01	12.2504
66	22	2	2	4	4	3.08621	67.379	749.818	1124.73	10.2961
64	24	2	2	4	4	3.06818	68.1921	749.818	1124.73	10.4885
64	22	4	0	4	6	3.07386	53.621	749.771	1124.66	10.8639
70	20	0	6	2	2	3.11765	60.4924	749.694	1124.54	13.4925
62	26	2	2	4	4	3.05056	67.9852	749.643	1124.46	10.2961
38	50	2	8	0	2	2.86634	107.99	749.632	1124.45	33.26
36	50	4	8	0	2	2.85784	79.5273	749.632	1124.45	33.7971
36	52	2	8	0	2	2.85294	107.257	749.632	1124.45	35.3027
34	52	4	8	0	2	2.84466	82.2489	749.632	1124.45	35.9207
62	24	4	0	4	6	3.05618	53.2482	749.596	1124.39	11.7482
60	26	4	0	4	6	3.03889	54.5058	749.596	1124.39	11.5763
54	30	6	0	10	0	2.99462	62.3249	749.576	1124.36	10.4903
32	54	4	2	6	2	2.83173	79.195	749.521	1124.28	34.5014
32	56	2	2	6	2	2.82692	108.635	749.521	1124.28	36.1993
30	56	4	2	6	2	2.81905	80.2782	749.521	1124.28	37.019
30	58	2	2	6	2	2.81429	109.718	749.521	1124.28	38.7098
28	58	4	2	6	2	2.8066	80.2782	749.521	1124.28	39.5787
28	60	2	2	6	2	2.80189	109.718	749.521	1124.28	41.2615
26	60	4	2	6	2	2.79439	79.4423	749.521	1124.28	42.1727
26	62	2	2	6	2	2.78972	108.882	749.521	1124.28	43.8473
24	62	4	2	6	2	2.78241	80.5752	749.521	1124.28	44.7952
24	64	2	2	6	2	2.77778	110.015	749.521	1124.28	46.4614
22	64	4	2	6	2	2.77064	80.0006	749.521	1124.28	47.4414
22	66	2	2	6	2	2.76606	109.44	749.521	1124.28	49.0993
20	66	4	2	6	2	2.75909	80.0006	749.521	1124.28	50.1075
20	68	2	2	6	2	2.75455	109.472	749.521	1124.28	51.7573
18	68	4	2	6	2	2.74775	80.032	749.521	1124.28	52.7906
18	70	2	2	6	2	2.74324	109.472	749.521	1124.28	54.4325
16	70	4	2	6	2	2.73661	80.032	749.521	1124.28	55.4881
16	72	2	2	6	2	2.73214	111.105	749.521	1124.28	57.1226
14	72	4	2	6	2	2.72566	82.8575	749.521	1124.28	58.1981
14	74	2	2	6	2	2.72124	112.297	749.521	1124.28	59.8254
12	74	4	2	6	2	2.71491	82.8575	749.521	1124.28	60.9189
12	76	2	2	6	2	2.71053	112.297	749.521	1124.28	62.5394
10	76	4	2	6	2	2.70435	82.8575	749.521	1124.28	63.6491
10	78	2	2	6	2	2.7	111.217	749.521	1124.28	65.2631
8	78	4	2	6	2	2.69397	79.5512	749.521	1124.28	66.3875
8	80	2	2	6	2	2.68966	108.991	749.521	1124.28	67.9953
6	80	4	2	6	2	2.68376	79.5512	749.521	1124.28	69.1332
6	82	2	2	6	2	2.67949	108.991	749.521	1124.28	70.7352
4	82	4	2	6	2	2.67373	79.5512	749.521	1124.28	71.8853
4	84	2	2	6	2	2.66949	108.278	749.521	1124.28	73.4817
2	84	4	2	6	2	2.66387	78.798	749.521	1124.28	74.6432
2	86	2	2	6	2	2.65966	108.014	749.521	1124.28	76.2343
0	86	4	2	6	2	2.65417	78.5745	749.521	1124.28	77.4061
0	88	2	2	6	2	2.65	108.115	749.521	1124.28	78.9922
56	30	4	0	4	6	3.00543	61.8869	749.351	1124.03	13.192
62	22	6	0	10	0	3.0618	56.9483	749.31	1123.97	7.34995
60	24	6	0	10	0	3.04444	57.6545	749.31	1123.97	7.07262
58	26	6	6	0	4	3.02747	59.7585	749.274	1123.91	15.3249
58	28	4	2	4	4	3.02198	74.2833	749.15	1123.72	11.4024
52	32	6	6	4	0	2.97872	74.8867	749.091	1123.64	16.4339
52	32	6	4	4	2	2.97872	75.8237	749.07	1123.61	15.9397
56	28	6	6	0	4	3.01087	72.3817	748.935	1123.4	16.2744
54	28	8	2	8	0	3	69.1715	748.904	1123.36	12.0851
58	26	6	10	0	0	3.02747	63.6525	748.699	1123.05	14.7041
54	28	8	0	8	2	3	64.1702	748.622	1122.93	12.0851
46	36	8	8	2	0	2.93814	75.4358	748.474	1122.71	21.9561
42	46	2	8	0	2	2.89394	97.891	748.426	1122.64	29.5661
40	46	4	8	0	2	2.885	68.8014	748.426	1122.64	29.9026
40	48	2	8	0	2	2.88	96.5311	748.426	1122.64	31.3399
38	48	4	8	0	2	2.87129	80.26	748.426	1122.64	31.7837
62	22	6	0	8	2	3.0618	52.3394	748.417	1122.63	8.60359
60	24	6	0	8	2	3.04444	53.0456	748.417	1122.63	8.36792
34	54	2	8	0	2	2.83981	109.979	748.411	1122.62	37.4477
46	44	0	0	6	4	2.91753	64.8034	748.373	1122.56	23.0245
56	28	6	10	0	0	3.01087	69.7927	748.36	1122.54	15.6913
50	32	8	8	2	0	2.96842	72.5799	748.306	1122.46	17.6901
48	34	8	8	2	0	2.95312	74.9452	748.306	1122.46	19.9744
74	16	0	6	4	0	3.15663	69.3096	748.154	1122.23	11.025
46	40	4	8	2	0	2.92784	87.119	748.029	1122.04	23.7084
46	42	2	8	2	0	2.92268	86.1095	748.029	1122.04	25.0221
44	42	4	8	2	0	2.91327	87.4071	748.029	1122.04	25.1019
44	44	2	8	2	0	2.90816	86.3975	748.029	1122.04	26.4977
42	44	4	8	2	0	2.89899	82.7211	748.029	1122.04	26.7232
58	26	6	6	2	2	3.02747	57.3467	748.022	1122.03	13.9116
80	10	0	2	0	8	3.21875	44.8604	748.019	1122.03	2.82843
62	22	6	2	8	0	3.0618	68.6297	747.984	1121.98	8.60359
60	24	6	2	8	0	3.04444	69.3359	747.984	1121.98	8.36792
80	10	0	10	0	0	3.21875	64.5597	747.927	1121.89	11.5721
46	38	6	6	4	0	2.93299	73.595	747.859	1121.79	20.4469
46	38	6	4	4	2	2.93299	73.6752	747.837	1121.76	20.0519
38	50	2	2	6	2	2.86634	108.598	747.693	1121.54	29.0212
36	50	4	2	6	2	2.85784	78.4257	747.693	1121.54	29.6352
36	52	2	2	6	2	2.85294	107.865	747.693	1121.54	31.3413
34	52	4	2	6	2	2.84466	78.4257	747.693	1121.54	32.0358
50	34	6	6	4	0	2.96316	73.9768	747.691	1121.54	18.3877
56	28	6	6	2	2	3.01087	69.9699	747.683	1121.52	14.9512
50	34	6	4	4	2	2.96316	74.057	747.669	1121.5	17.9474
62	22	6	4	0	6	3.0618	64.7006	747.644	1121.47	12.0844
32	58	0	0	6	4	2.82212	88.7006	747.351	1121.03	38.137
30	60	0	0	6	4	2.80952	89.3035	747.351	1121.03	40.6263
28	62	0	0	6	4	2.79717	88.4675	747.351	1121.03	43.1574
26	64	0	0	6	4	2.78505	89.6004	747.351	1121.03	45.7235
24	66	0	0	6	4	2.77315	89.6004	747.351	1121.03	48.3189
22	68	0	0	6	4	2.76147	89.0259	747.351	1121.03	50.9391
20	70	0	0	6	4	2.75	89.0572	747.351	1121.03	53.5805
18	72	0	0	6	4	2.73874	89.0572	747.351	1121.03	56.2402
16	74	0	0	6	4	2.72768	90.6904	747.351	1121.03	58.9156
14	76	0	0	6	4	2.71681	91.8827	747.351	1121.03	61.6047
12	78	0	0	6	4	2.70614	91.8827	747.351	1121.03	64.3058
10	80	0	0	6	4	2.69565	85.9243	747.351	1121.03	67.0174
8	82	0	0	6	4	2.68534	89.1231	747.351	1121.03	69.7383
6	84	0	0	6	4	2.67521	89.1231	747.351	1121.03	72.4675
4	86	0	0	6	4	2.66525	88.4098	747.351	1121.03	75.204
2	88	0	0	6	4	2.65546	88.1464	747.351	1121.03	77.947
0	90	0	0	6	4	2.64583	91.7773	747.351	1121.03	80.696
52	32	6	0	2	8	2.97872	55.8398	747.057	1120.59	18.3868
60	22	8	0	10	0	3.05	60.842	747.029	1120.54	9.48885
58	24	8	0	10	0	3.03297	60.8927	747.029	1120.54	9.27533
32	54	4	8	2	0	2.83173	83.497	747.006	1120.51	37.0722
32	56	2	8	2	0	2.82692	111.227	747.006	1120.51	38.6573
30	56	4	8	2	0	2.81905	84.5803	747.006	1120.51	39.426
30	58	2	8	2	0	2.81429	112.31	747.006	1120.51	41.0177
28	58	4	8	2	0	2.8066	84.5803	747.006	1120.51	41.8386
28	60	2	8	2	0	2.80189	112.31	747.006	1120.51	43.434
26	60	4	8	2	0	2.79439	83.7443	747.006	1120.51	44.3005
26	62	2	8	2	0	2.78972	111.474	747.006	1120.51	45.8975
24	62	4	8	2	0	2.78241	84.3779	747.006	1120.51	46.804
24	64	2	8	2	0	2.77778	112.108	747.006	1120.51	48.401
22	64	4	8	2	0	2.77064	83.8034	747.006	1120.51	49.3425
22	66	2	8	2	0	2.76606	111.533	747.006	1120.51	50.9386
20	66	4	8	2	0	2.75909	83.8034	747.006	1120.51	51.9111
20	68	2	8	2	0	2.75455	111.564	747.006	1120.51	53.5053
18	68	4	8	2	0	2.74775	83.8347	747.006	1120.51	54.5055
18	70	2	8	2	0	2.74324	111.564	747.006	1120.51	56.0973
16	70	4	8	2	0	2.73661	83.8347	747.006	1120.51	57.1221
16	72	2	8	2	0	2.73214	113.198	747.006	1120.51	58.7111
14	72	4	8	2	0	2.72566	86.6602	747.006	1120.51	59.758
14	74	2	8	2	0	2.72124	114.39	747.006	1120.51	61.3439
12	74	4	8	2	0	2.71491	86.6602	747.006	1120.51	62.4108
12	76	2	8	2	0	2.71053	114.39	747.006	1120.51	63.9935
10	76	4	8	2	0	2.70435	86.6602	747.006	1120.51	65.0785
10	78	2	8	2	0	2.7	113.31	747.006	1120.51	66.6578
8	78	4	8	2	0	2.69397	83.3539	747.006	1120.51	67.7591
8	80	2	8	2	0	2.68966	111.084	747.006	1120.51	69.3352
6	80	4	8	2	0	2.68376	83.3539	747.006	1120.51	70.4514
6	82	2	8	2	0	2.67949	111.084	747.006	1120.51	72.0241
4	82	4	8	2	0	2.67373	83.3539	747.006	1120.51	73.1539
4	84	2	8	2	0	2.66949	110.37	747.006	1120.51	74.7233
2	84	4	8	2	0	2.66387	82.6007	747.006	1120.51	75.8657
2	86	2	8	2	0	2.65966	110.107	747.006	1120.51	77.4317
0	86	4	8	2	0	2.65417	82.3772	747.006	1120.51	78.5856
0	88	2	8	2	0	2.65	110.208	747.006	1120.51	80.1484
76	12	2	4	0	6	3.18293	56.0684	746.964	1120.45	7.07159
62	22	6	0	0	10	3.0618	51.6261	746.961	1120.44	8.60423
80	10	0	0	0	10	3.21875	43.0132	746.832	1120.25	0
46	36	8	4	6	0	2.93814	75.2047	746.787	1120.18	17.4949
52	32	6	2	2	6	2.97872	74.9709	746.769	1120.15	17.7221
48	36	6	6	4	0	2.94792	75.184	746.711	1120.07	19.3409
48	36	6	4	4	2	2.94792	75.2642	746.69	1120.03	18.9228
62	22	6	2	0	8	3.0618	62.2068	746.673	1120.01	10.1011
50	32	8	4	6	0	2.96842	73.1247	746.619	1119.93	15.8137
48	34	8	4	6	0	2.95312	74.7141	746.619	1119.93	16.4338
64	22	4	2	4	4	3.07386	68.0429	746.611	1119.92	10.8633
56	26	8	8	0	2	3.0163	68.657	746.53	1119.79	13.572
46	44	0	0	4	6	2.91753	62.8653	746.508	1119.76	24.7007
42	46	2	2	6	2	2.89394	97.4245	746.487	1119.73	24.7013
40	46	4	2	6	2	2.885	67.6999	746.487	1119.73	25.103
40	48	2	2	6	2	2.88	97.1397	746.487	1119.73	26.7991
38	48	4	2	6	2	2.87129	79.1584	746.487	1119.73	27.3167
34	54	2	2	6	2	2.83981	107.865	746.472	1119.71	33.7391
62	24	4	2	4	4	3.05618	67.67	746.436	1119.65	11.0462
60	26	4	2	4	4	3.03889	68.9276	746.436	1119.65	10.8633
46	40	4	4	6	0	2.92784	85.8918	746.341	1119.51	19.6491
46	42	2	4	6	0	2.92268	86.5923	746.341	1119.51	21.2157
44	42	4	4	6	0	2.91327	86.1799	746.341	1119.51	21.3098
44	44	2	4	6	0	2.90816	86.8804	746.341	1119.51	22.9374
42	44	4	4	6	0	2.89899	81.4939	746.341	1119.51	23.1977
58	30	2	0	6	4	3.01648	62.3583	746.332	1119.5	9.69617
52	32	6	4	2	4	2.97872	77.8128	746.316	1119.47	17.495
76	14	0	8	2	0	3.17683	65.3645	746.297	1119.44	13.3249
56	30	4	2	4	4	3.00543	75.7388	746.192	1119.29	12.5709
78	12	0	6	2	2	3.19753	51.6078	746.149	1119.22	10.5834
60	22	8	0	8	2	3.05	56.2331	746.135	1119.2	10.4899
58	24	8	0	8	2	3.03297	56.2837	746.135	1119.2	10.2972
76	14	0	2	8	0	3.17683	59.3199	745.951	1118.93	5.24688
40	50	0	0	6	4	2.875	76.7251	745.925	1118.89	28.8136
74	16	0	4	4	2	3.15663	61.8579	745.921	1118.88	10.2738
78	12	0	4	2	4	3.19753	52.25	745.904	1118.86	8.0005
46	38	6	0	2	8	2.93299	48.4118	745.824	1118.74	22.6733
46	34	10	2	8	0	2.9433	74.6958	745.765	1118.65	15.0357
44	36	10	2	8	0	2.92857	75.5179	745.765	1118.65	16.434
76	12	2	6	0	4	3.18293	57.0077	745.724	1118.59	9.69574
60	22	8	2	8	0	3.05	68.2151	745.702	1118.55	10.4899
58	24	8	2	8	0	3.03297	68.2657	745.702	1118.55	10.2972
76	14	0	0	10	0	3.17683	54.8251	745.671	1118.51	3.0857
50	34	6	0	2	8	2.96316	53.0658	745.656	1118.48	20.1521
70	18	2	0	10	0	3.12353	59.5455	745.631	1118.45	7.35075
52	30	8	0	10	0	2.98404	66.1235	745.603	1118.4	11.5797
48	32	10	2	8	0	2.95833	73.3695	745.597	1118.4	14.0738
46	38	6	2	2	6	2.93299	73.5875	745.536	1118.3	22.1377
38	52	0	0	6	4	2.86139	88.1837	745.523	1118.28	31.0204
32	58	0	0	4	6	2.82212	86.7625	745.485	1118.23	39.1718
30	60	0	0	4	6	2.80952	87.3653	745.485	1118.23	41.5992
28	62	0	0	4	6	2.79717	86.5294	745.485	1118.23	44.0745
26	64	0	0	4	6	2.78505	87.6622	745.485	1118.23	46.5901
24	66	0	0	4	6	2.77315	87.6622	745.485	1118.23	49.1397
22	68	0	0	4	6	2.76147	87.0877	745.485	1118.23	51.7184
20	70	0	0	4	6	2.75	87.1191	745.485	1118.23	54.322
18	72	0	0	4	6	2.73874	87.1191	745.485	1118.23	56.947
16	74	0	0	4	6	2.72768	88.7522	745.485	1118.23	59.5907
14	76	0	0	4	6	2.71681	89.9446	745.485	1118.23	62.2506
12	78	0	0	4	6	2.70614	89.9446	745.485	1118.23	64.9249
10	80	0	0	4	6	2.69565	83.9862	745.485	1118.23	67.6116
8	82	0	0	4	6	2.68534	87.185	745.485	1118.23	70.3096
6	84	0	0	4	6	2.67521	87.185	745.485	1118.23	73.0174
4	86	0	0	4	6	2.66525	86.4717	745.485	1118.23	75.734
2	88	0	0	4	6	2.65546	86.2083	745.485	1118.23	78.4585
0	90	0	0	4	6	2.64583	89.8391	745.485	1118.23	81.1902
46	34	10	0	8	2	2.9433	63.4841	745.483	1118.22	15.0357
44	36	10	0	8	2	2.92857	64.3062	745.483	1118.22	16.434
50	34	6	2	2	6	2.96316	73.4684	745.368	1118.05	19.5476
62	22	6	6	0	4	3.0618	65.5157	745.348	1118.02	14.3538
32	54	4	4	6	0	2.83173	80.8003	745.319	1117.98	34.6172
32	56	2	4	6	0	2.82692	110.24	745.319	1117.98	36.3096
30	56	4	4	6	0	2.81905	81.8835	745.319	1117.98	37.1269
30	58	2	4	6	0	2.81429	111.323	745.319	1117.98	38.813
28	58	4	4	6	0	2.8066	81.8835	745.319	1117.98	39.6796
28	60	2	4	6	0	2.80189	111.323	745.319	1117.98	41.3584
26	60	4	4	6	0	2.79439	81.0476	745.319	1117.98	42.2675
26	62	2	4	6	0	2.78972	110.487	745.319	1117.98	43.9384
24	62	4	4	6	0	2.78241	82.1805	745.319	1117.98	44.8844
24	64	2	4	6	0	2.77778	111.62	745.319	1117.98	46.5474
22	64	4	4	6	0	2.77064	81.606	745.319	1117.98	47.5256
22	66	2	4	6	0	2.76606	111.046	745.319	1117.98	49.1807
20	66	4	4	6	0	2.75909	81.606	745.319	1117.98	50.1873
20	68	2	4	6	0	2.75455	111.077	745.319	1117.98	51.8345
18	68	4	4	6	0	2.74775	81.6373	745.319	1117.98	52.8663
18	70	2	4	6	0	2.74324	111.077	745.319	1117.98	54.506
16	70	4	4	6	0	2.73661	81.6373	745.319	1117.98	55.5602
16	72	2	4	6	0	2.73214	112.71	745.319	1117.98	57.1926
14	72	4	4	6	0	2.72566	84.4628	745.319	1117.98	58.2668
14	74	2	4	6	0	2.72124	113.903	745.319	1117.98	59.8922
12	74	4	4	6	0	2.71491	84.4628	745.319	1117.98	60.9845
12	76	2	4	6	0	2.71053	113.903	745.319	1117.98	62.6033
10	76	4	4	6	0	2.70435	84.4628	745.319	1117.98	63.7119
10	78	2	4	6	0	2.7	112.823	745.319	1117.98	65.3243
8	78	4	4	6	0	2.69397	81.1565	745.319	1117.98	66.4477
8	80	2	4	6	0	2.68966	110.596	745.319	1117.98	68.0541
6	80	4	4	6	0	2.68376	81.1565	745.319	1117.98	69.191
6	82	2	4	6	0	2.67949	110.596	745.319	1117.98	70.7917
4	82	4	4	6	0	2.67373	81.1565	745.319	1117.98	71.9409
4	84	2	4	6	0	2.66949	109.883	745.319	1117.98	73.5362
2	84	4	4	6	0	2.66387	80.4033	745.319	1117.98	74.6967
2	86	2	4	6	0	2.65966	109.62	745.319	1117.98	76.2868
0	86	4	4	6	0	2.65417	80.1798	745.319	1117.98	77.4578
0	88	2	4	6	0	2.65	109.721	745.319	1117.98	79.0429
48	32	10	0	8	2	2.95833	66.9309	745.315	1117.97	14.0738
38	50	2	8	2	0	2.86634	108.646	745.178	1117.77	32.0348
36	50	4	8	2	0	2.85784	80.1831	745.178	1117.77	32.5921
36	52	2	8	2	0	2.85294	107.913	745.178	1117.77	34.1508
34	52	4	8	2	0	2.84466	82.7278	745.178	1117.77	34.7893
46	38	6	4	2	4	2.93299	76.4294	745.083	1117.62	21.9563
50	34	6	4	2	4	2.96316	76.3103	744.915	1117.37	19.3419
62	22	6	10	0	0	3.0618	68.9437	744.773	1117.16	14.2909
70	16	4	0	10	0	3.12941	58.7364	744.733	1117.1	7.0731
48	36	6	0	2	8	2.94792	55.049	744.677	1117.01	21.6811
70	18	2	2	8	0	3.12353	65.5618	744.653	1116.98	8.60427
56	26	8	2	6	2	3.0163	67.9464	744.591	1116.89	12.0845
54	30	6	2	8	0	2.99462	73.4364	744.534	1116.8	11.4038
58	30	2	0	4	6	3.01648	60.4202	744.467	1116.7	12.0837
48	36	6	2	2	6	2.94792	75.4515	744.388	1116.58	21.1204
44	46	0	0	6	4	2.90306	64.0405	744.317	1116.48	24.7821
42	48	0	0	6	4	2.88889	77.0099	744.317	1116.48	26.7242
36	54	0	0	6	4	2.84804	87.4509	744.301	1116.45	33.3214
34	56	0	0	6	4	2.83495	87.4509	744.301	1116.45	35.6983
54	30	6	0	8	2	2.99462	62.6894	744.252	1116.38	11.4038
62	22	6	6	2	2	3.0618	63.1039	744.096	1116.14	13.4741
40	50	0	0	4	6	2.875	74.787	744.06	1116.09	30.1699
78	12	0	4	6	0	3.19753	55.0567	743.974	1115.96	8.21874
42	46	2	8	2	0	2.89394	98.5469	743.973	1115.96	28.1808
40	46	4	8	2	0	2.885	69.4573	743.973	1115.96	28.5335
40	48	2	8	2	0	2.88	97.187	743.973	1115.96	30.0365
38	48	4	8	2	0	2.87129	80.9159	743.973	1115.96	30.4992
72	18	0	4	2	4	3.1369	63.6954	743.96	1115.94	9.69635
34	54	2	8	2	0	2.83981	110.457	743.957	1115.94	36.3638
48	36	6	4	2	4	2.94792	78.2935	743.936	1115.9	20.9301
58	26	6	8	0	2	3.02747	59.0552	743.927	1115.89	14.749
54	28	8	4	0	6	3	69.5701	743.838	1115.76	16.5182
70	16	4	2	8	0	3.12941	64.3552	743.754	1115.63	8.36832
38	52	0	0	4	6	2.86139	86.2455	743.657	1115.49	32.2841
60	24	6	4	0	6	3.04444	65.1158	743.634	1115.45	13.1926
70	18	2	8	2	0	3.12353	67.5198	743.596	1115.39	15.1669
56	28	6	8	0	2	3.01087	71.6783	743.588	1115.38	15.7333
38	50	2	4	6	0	2.86634	110.204	743.491	1115.24	29.1587
36	50	4	4	6	0	2.85784	80.031	743.491	1115.24	29.7699
36	52	2	4	6	0	2.85294	109.471	743.491	1115.24	31.4687
34	52	4	4	6	0	2.84466	80.031	743.491	1115.24	32.1604
46	44	0	2	4	4	2.91753	91.3643	743.348	1115.02	24.3747
72	18	0	0	2	8	3.1369	54.0472	743.157	1114.74	6.16597
54	28	8	0	0	10	3	55.1812	743.155	1114.73	16.5569
78	12	0	2	2	6	3.19753	51.3712	743.076	1114.61	5.65757
68	20	2	10	0	0	3.10465	72.4456	743.056	1114.58	16.9123
60	24	6	0	0	10	3.04444	52.0412	742.951	1114.43	10.1017
72	18	0	2	2	6	3.1369	60.7799	742.869	1114.3	7.61703
54	28	8	2	0	8	3	59.4463	742.867	1114.3	17.3819
70	16	4	8	2	0	3.12941	66.8955	742.697	1114.05	15.0343
[truncated: 20,702 more rows]
