# Supplementary material for: Accelerating discovery of glass materials in electronic devices through topology-guided machine learning
Source: Royal Society of Chemistry journal article supplement (doi:10.1039/d4ta08686d), 2025-01-01
Supplement: d4ta08686d3.pdf [file d4ta08686d3.pdf]

Supplementary information

S1: Five candidates glass information

S-Table 1 Five candidates glass information

| Index | SiO <sub>2</sub> | Al <sub>2</sub> O <sub>3</sub> | B <sub>2</sub> O <sub>3</sub> | K <sub>2</sub> O | Na <sub>2</sub> O | Li <sub>2</sub> O | Distance | <i>n<sub>c</sub></i> |
|-------|------------------|--------------------------------|-------------------------------|------------------|-------------------|-------------------|----------|----------------------|
| 1     | 28               | 12                             | 50                            | 0                | 0                 | 10                | 12.95    | 2.915                |
| 2     | 64               | 2                              | 24                            | 0                | 8                 | 2                 | 3.742    | 3.131                |
| 3     | 66               | 2                              | 22                            | 0                | 2                 | 8                 | 3.1544   | 3.143                |
| 4     | 38               | 10                             | 42                            | 0                | 10                | 0                 | 14.773   | 2.965                |
| 5     | 50               | 10                             | 30                            | 0                | 0                 | 10                | 0        | 3.026                |

S2: XRD pattern of the five potential glass for the matched sealing with Kovar alloy

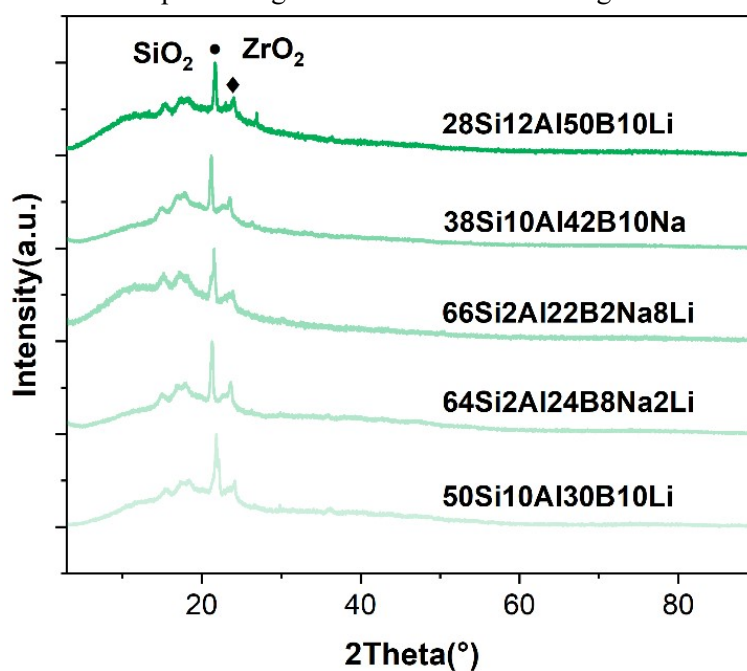

Supplementary Figure 1 XRD pattern of the five potential glass

### S3: Raw data analysis

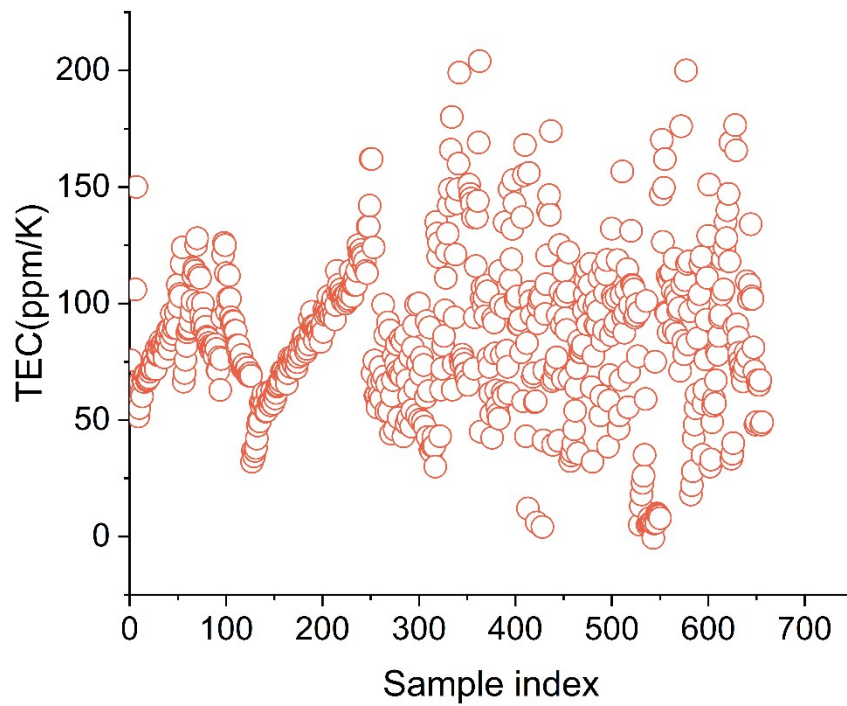

Supplementary Figure 2 TEC distribution of the glasses in the Sciglass dataset

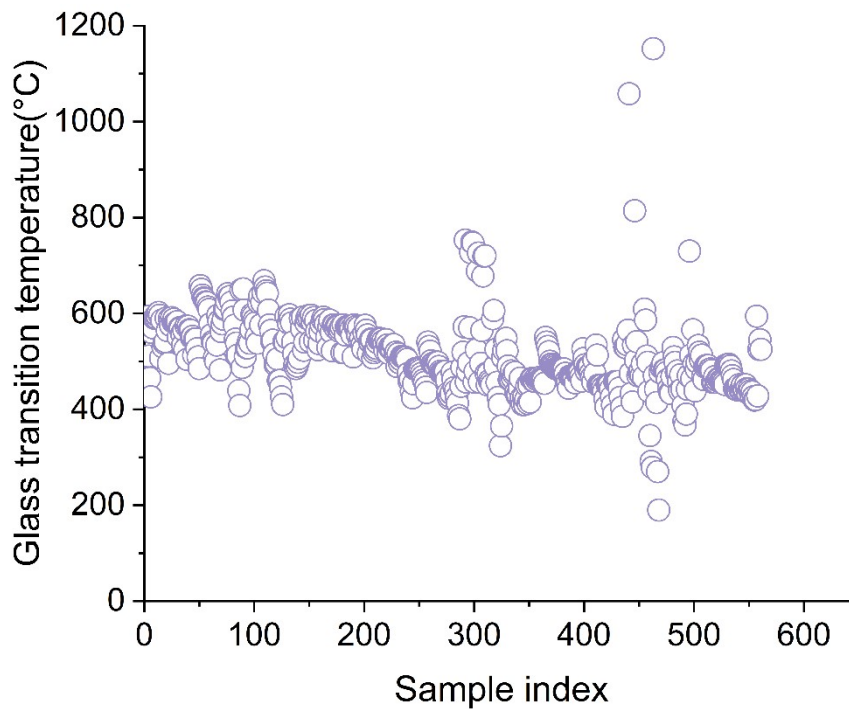

Supplementary Figure 3 T<sub>g</sub> distribution of the glasses in the Sciglass dataset

From the distribution of the raw data, it can be observed that the thermal expansion coefficient data is relatively uniformly distributed. The thermal expansion coefficient of the samples range from 0.5~20 ppm/K. Therefore, we believe that the prediction model for the thermal expansion coefficient trained on this data will also achieve good accuracy, which is consistent with our research presented in the main body of the manuscript. In contrast, the distribution of the glass transition temperature data shows that the glass transition temperatures of most glass

compositions are concentrated between 400~600°C. This may result in inherent systematic bias during the training process of the glass transitions with glass transition temperatures between 400°C and 600°C more accurately. However, predictions for glass compositions with significantly higher or lower glass transition temperatures may exhibit considerable errors. If model optimization is required in the future, this will be the primary area for improvement.

#### S4: Validation analysis outside the Sciglass dataset

We use external data from *Thermal Expansion of Binary Alkali Silicate*. Machine learning model generated through topological constrained theory have demonstrated that the thermal expansion coefficient model can make highly accurate predictions, whether using Sciglass data or external data. However, for the glass transition temperature, it's evident that the uneven distribution of training data has caused significant deviations in the model's performance on external data, which is not characteristic of a good model. Nevertheless, since the glass transition temperature is not a highly important properties in the glass used for our electronic devices, the current level of accuracy still allows us to discover new glass materials.

Supplementary Table 1 Predicted and experimental values of the thermal expansion coefficient model validated with external data

| SiO <sub>2</sub> | Al <sub>2</sub> O <sub>3</sub> | B <sub>2</sub> O <sub>3</sub> | K <sub>2</sub> O | Na <sub>2</sub> O | Li <sub>2</sub> O | TEC <sub>exp</sub><br>(10 <sup>-7</sup> /K) | TEC <sub>pred</sub><br>(10 <sup>-7</sup> /K) | Deviation<br>(10 <sup>-7</sup> /K) |
|------------------|--------------------------------|-------------------------------|------------------|-------------------|-------------------|---------------------------------------------|----------------------------------------------|------------------------------------|
| 68               | 0                              | 0                             | 0                | 0                 | 32                | 95.2                                        | 109.12                                       | 13.925                             |
| 65.4             | 0                              | 0                             | 0                | 0                 | 34.6              | 99.6                                        | 115.73                                       | 16.1332                            |
| 62.1             | 0                              | 0                             | 0                | 0                 | 37.9              | 106.2                                       | 123.04                                       | 16.8556                            |
| 60.4             | 0                              | 0                             | 0                | 0                 | 39.6              | 109.5                                       | 126.24                                       | 16.7405                            |
| 79.7             | 0                              | 0                             | 0                | 20.3              | 0                 | 97.5                                        | 97.31                                        | 0.18769                            |
| 76               | 0                              | 0                             | 0                | 24                | 0                 | 109.7                                       | 112.96                                       | 3.2636                             |
| 68.9             | 0                              | 0                             | 0                | 31.1              | 0                 | 136                                         | 139.17                                       | 3.1719                             |
| 66.2             | 0                              | 0                             | 0                | 33.8              | 0                 | 143.9                                       | 148.93                                       | 5.0305                             |
| 62.8             | 0                              | 0                             | 0                | 37.2              | 0                 | 152.1                                       | 159.73                                       | 7.6292                             |
| 82.7             | 00                             | 0                             | 17.3             | 0                 | 0                 | 101.2                                       | 98.62                                        | 2.5751                             |
| 76.8             | 0                              | 0                             | 23.2             | 0                 | 0                 | 129.6                                       | 126.97                                       | 2.63023                            |
| 72.2             | 0                              | 0                             | 27.8             | 0                 | 0                 | 150                                         | 147.92                                       | 2.0850                             |
| 68.2             | 0                              | 0                             | 31.8             | 0                 | 0                 | 158.2                                       | 165.30                                       | 7.0971                             |

Supplementary Table 2 Predicted and experimental values of the glass transition temperature model validated with external data

| SiO <sub>2</sub> | Al <sub>2</sub> O <sub>3</sub> | B <sub>2</sub> O <sub>3</sub> | K <sub>2</sub> O | Na <sub>2</sub> O | Li <sub>2</sub> O | Tg <sub>exp</sub><br>(10 <sup>-7</sup> /K) | Tg <sub>pred</sub><br>(10 <sup>-7</sup> /K) | Deviation<br>(10 <sup>-7</sup> /K) |
|------------------|--------------------------------|-------------------------------|------------------|-------------------|-------------------|--------------------------------------------|---------------------------------------------|------------------------------------|
| 68               | 0                              | 0                             | 0                | 0                 | 32                | 498                                        | 670.396                                     | 172.396                            |

|      |    |   |      |      |      |     |          |         |
|------|----|---|------|------|------|-----|----------|---------|
| 65.4 | 0  | 0 | 0    | 0    | 34.6 | 483 | 670.409  | 187.409 |
| 62.1 | 0  | 0 | 0    | 0    | 37.9 | 481 | 670.41   | 189.41  |
| 60.4 | 0  | 0 | 0    | 0    | 39.6 | 477 | 670.41   | 193.41  |
| 79.7 | 0  | 0 | 0    | 20.3 | 0    | 507 | 477.169  | 29.831  |
| 76   | 0  | 0 | 0    | 24   | 0    | 503 | 469.078  | 33.9218 |
| 68.9 | 0  | 0 | 0    | 31.1 | 0    | 490 | 468.725  | 21.275  |
| 66.2 | 0  | 0 | 0    | 33.8 | 0    | 479 | 464.8846 | 14.1154 |
| 62.8 | 0  | 0 | 0    | 37.2 | 0    | 467 | 444.953  | 22.047  |
| 82.7 | 00 | 0 | 17.3 | 0    | 0    | 528 | 636.1479 | 108.148 |
| 76.8 | 0  | 0 | 23.2 | 0    | 0    | 511 | 666.7946 | 155.795 |
| 72.2 | 0  | 0 | 27.8 | 0    | 0    | 453 | 670.1262 | 217.126 |
| 68.2 | 0  | 0 | 31.8 | 0    | 0    | 454 | 670.3932 | 216.393 |

S5: Uncertainty of the machine learning model

Supplementary Table 3 Uncertainty distribution of the thermal expansion coefficient prediction model

| ANN      | SVM      | Tree Decision | Average  | Standard deviation |
|----------|----------|---------------|----------|--------------------|
| 670.3957 | 542.709  | 480.8338      | 564.6462 | 68.35333           |
| 670.4086 | 545.2884 | 477.3263      | 564.3411 | 69.25476           |
| 670.4102 | 548.5622 | 457.7323      | 558.9016 | 75.45908           |
| 670.4102 | 550.2488 | 457.7323      | 559.4638 | 75.40445           |
| 477.169  | 479.5302 | 480.3131      | 479.0041 | 1.157363           |
| 469.0782 | 473.8012 | 467.2676      | 470.049  | 2.38525            |
| 468.725  | 462.8076 | 471.2846      | 467.6057 | 3.07445            |
| 464.8846 | 458.627  | 469.1697      | 464.2271 | 3.749092           |
| 444.953  | 453.3625 | 444.3311      | 447.5489 | 3.566894           |
| 636.1479 | 528.1254 | 483.6686      | 549.314  | 55.44907           |
| 666.7946 | 533.9787 | 475.0758      | 558.6164 | 69.44166           |
| 670.1262 | 538.5422 | 482.6594      | 563.7759 | 68.05699           |
| 670.3932 | 542.5106 | 480.8338      | 564.5792 | 68.36835           |

Supplementary Table 4 Supplementary Table 3 Uncertainty distribution of glass transition temperature prediction model

| XGBoot   | LinearRegression | SVM      | Tree Decision | Average  | Standard deviation |
|----------|------------------|----------|---------------|----------|--------------------|
| 109.125  | 110.3961         | 105.9034 | 107.08        | 108.1261 | 1.745371           |
| 115.7332 | 118.7028         | 113.3551 | 117.5833      | 116.3436 | 2.025257           |
| 123.0356 | 128.7688         | 122.654  | 180.75        | 138.8021 | 24.33945           |

|          |          |          |          |          |          |
|----------|----------|----------|----------|----------|----------|
| 126.2405 | 133.099  | 127.3748 | 180.75   | 141.8661 | 22.59965 |
| 97.31231 | 97.21065 | 98.1323  | 95.9648  | 97.15501 | 0.774521 |
| 112.9636 | 112.119  | 113.1646 | 111.3238 | 112.3928 | 0.731311 |
| 139.1719 | 142.1259 | 140.3559 | 148.8333 | 142.6218 | 3.737129 |
| 148.9305 | 153.3548 | 150.1253 | 140.4875 | 148.2245 | 4.751114 |
| 159.7292 | 167.0155 | 161.9799 | 168.3292 | 164.2634 | 3.531222 |
| 98.6249  | 96.1773  | 99.5326  | 87.15    | 95.3712  | 4.902594 |
| 126.9698 | 124.9929 | 128.1305 | 141.7778 | 130.4677 | 6.625513 |
| 147.915  | 146.7902 | 149.1597 | 162.3714 | 151.5591 | 6.298509 |
| 165.2971 | 165.592  | 166.5431 | 162.3714 | 164.9509 | 1.558826 |
